# Supplementary material for: Toward low-cost biological and hybrid biological/catalytic conversion of cellulosic biomass to fuels
Source: Royal Society of Chemistry journal article supplement (doi:10.1039/d1ee02540f), 2022-01-01
Supplement: d1ee02540f1.xlsx [file d1ee02540f1.xlsx]

## Sheet: Compounds
Pub_ID	Fermentation Product	Maximum Titer g L-1	yield (g/g substrate)	Productivity(g/L/h)	Organism	Medium	Aerobic/Anaerobic	Conditions	Substrate	Genotype	Reference	Column1
1	acetoin	165.9	N/A	11.43 g L-1h-1	Gluconobacter oxydans (NL71)	yeast extract 15.0 g/L, MgSO4 0.5 g/L, KH2PO4 1.0 g/L, K2HPO4 2.0 g/L, (NH4)2SO4 5.0 g/L	Aerobic	3.0 L fermenter using COS-SSTR, pure oxygen, 36 h, 30 °C, 500 rpm	2,3-butanediol.	No modifications	Zhou, X., Zhou, X., Zhang, H., Cao, R., & Xu, Y. (2018). Improving the performance of cell biocatalysis and the productivity of acetoin from 2,3-butanediol using a compressed oxygen supply. Process Biochemistry, 64, 46–50. https://doi.org/10.1016/j.procbio.2017.09.027
2	acetoin	103	0.419	1.89 g L-1h-1	Corynebacterium glutamicum (CGS11)	LBRC medium containing (per liter): 10 g yeast extract, 50 g corn steep liquor, 1 g urea, 0.5 g K2HPO4, 0.5 g MgSO4·7H2O and 2 g sodium acetate, pH 7.0.	Aerobic	Fed-batch, 55h, 100 mL of LBRC seed culture was used to inoculate a 5-L fermenter, 1.8 L of LBRC medium, 300C, aeration rate of 1 vvm, 600 rpm agitation speed, initial pH 6.5 (not controled), initial glucose concentration 50 g L-1 controled between 10- 50 g L-1	glucose	ATCC13032∆pta∆ack∆ldh∆buta∆nagD, ∆ackA::Ptuf -alsSD ∆ppc P1-gltA,∆butA::Ptuf -alsSD, ∆nagD::Ptuf -alsSD pEC-XK99E-alsSD-∆lacIq	Lu, L., Mao, Y., Kou, M., Cui, Z., Jin, B., Chang, Z., Wang, Z., Ma, H., & Chen, T. (2020). Engineering central pathways for industrial-level (3R)-acetoin biosynthesis in Corynebacterium glutamicum. Microbial Cell Factories, 19(1), 102. https://doi.org/10.1186/s12934-020-01363-8
3	acetoin	100	0.44	1.82 g L-1 h-1	Saccharomyces cerevisiae (JHY617-SDN)	YPD medium: 10 g/L yeast extract, 20 g/L bacto-peptone, 200 μg/mL G418 sulfate	Aerobic	Fed-batch, 500 mL YPD medium, 100 g/L glucose, 30oC, 500 rpm agitation, 1 vvm air flow, 5.5 pH (mentained using 4N NaOH	glucose	MAT a ura3-52 trp1-289 leu2-3,112 his3Δ1 MAL2-8C SUC2 adh1Δ::loxP adh2Δ::loxP adh3Δ::loxP adh4Δ::loxP adh5Δ::loxP gpd1Δ::loxP gpd2Δ::loxP bdh1Δ::KanMX6 harboring p413-SDN	Bae, S. J., Kim, S., & Hahn, J. S. (2016). Efficient production of acetoin in Saccharomyces cerevisiae by disruption of 2,3-butanediol dehydrogenase and expression of NADH oxidase. Scientific Reports, 6. https://doi.org/10.1038/srep27667
4	acetoin	96.2	0.36	1.30 g L-1h-1	Corynebacterium glutamicum (CGR7)	CGXIIY medium, containing (NH4)2SO4 10 g/L，urea 5 g/L，KH2PO4 1 g/L，K2HPO4 1 g/L， MgSO4 •7 H2O 0.25 g/L，CaCl2 10 mg/L，FeSO4•7 H2O 10 mg/L，MnSO4 •H2O 0.1 mg/L，ZnSO4 •7 H2O 1 mg/L，CuSO4 •5 H2O 0.2 mg/L，NiCl2 •6 H2O 20 µg/L，yeast extract (Sangon, China) 0.5 g/L,	Aerobic	fed-batch, C. glutamicum final concentration of 0.2 mg/L,220 rpm, 40 g/L glucose	glucose	ATCC13032△pta△ack△ldh△butA△nagD; ackA::alsSD;pEC-XK99E-alsSD-△lacIq	Mao, Y., Fu, J., Tao, R., Huang, C., Wang, Z., Tang, Y. J., Chen, T., & Zhao, X. (2017). Systematic metabolic engineering of: Corynebacterium glutamicum for the industrial-level production of optically pure d-(-)-acetoin. Green Chemistry, 19(23), 5691–5702. https://doi.org/10.1039/c7gc02753b
5	acetoin	89.2	0.912	1.24 g L-1h-1	Gluconobacter oxydans (DSM 2003)	20 g/L yeast extract, 1.5 g/L (NH4)2SO4, 1.5 g/L KH2PO4, 0.5 g MgSO4 7H2O, and 40 g/L 2,3-butanediol 20 g/L added at 12, 24, and 36 hours, pH was maintained at 6.0	Aerobic	300 mL shake flasks, 30°C, pH 6.0, 50 mL of medium	2,3-butanediol	No modifications	Wang, X., Lv, M., Zhang, L., Li, K., Gao, C., Ma, C., & Xu, P. (2013). Efficient bioconversion of 2,3-butanediol into acetoin using Gluconobacter oxydans DSM 2003. Biotechnology for Biofuels, 6(1), 155. https://doi.org/10.1186/1754-6834-6-155
6	acetoin	83.7	0.448	1.02 g L-1h-1	Bacillus subtilis (CGMCC 13141)	CSLP 2 g/L, HPO42- 0.15 mol/L, NH4+ 0.2 mol/L, K+ 0.1 mol/L, Mg2+ 2.5 mmol/L, SO42− 2.5 mmol/L, Fe2+ 0.01 mmol/L, Zn2+ 0.001 mmol/L, Cu2+ 0.001 mmol/L, Mn2+ 0.053 mmol/L and Co2+ 0.004 mmol/L,	Aerobic	fed-batch, aeration rate of 0.2 vmm, 82 h, glucose 100 g/L, 170 rpm	glucose	GenBank accession number: MG727662	Dai, J., Wang, Z., & Xiu, Z. L. (2019). High production of optically pure (3R)-acetoin by a newly isolated marine strain of Bacillus subtilis CGMCC 13141. Bioprocess and Biosystems Engineering, 42(3), 475–483. https://doi.org/10.1007/s00449-018-2051-8
7	acetoin	82.5	0.46	1.59 g L-1h-1	Bacillus subtilis (HS019)	180 g/L glucose (30 g/L glucose at 24 h), 15 g/L yeast extract, 15 g/L soya peptone, 0.5 g/L NaCl, 3 g/L KH2PO4, 3 g/L K2HPO4, 0.4 g/L MgSO4·7H2O, and 0.5 g/L CH3COONa, Antibiotics were added at appropriate concentrations: kanamycin (30 μg/mL), ampicillin (100 μg/mL), and chloramphenicol (15 μg/mL). For inducers, 5 g/L xylose and 0.4 mM isopropyl β- D -1-thiogalactopyranoside (IPTG) were added at…	Aerobic	30L fermentor, 18L medium, water 16.2L, pH maintained at 6.5, 37oC, 1.0 vvm, 350 rpm (first 36h) 500 rpm after	glucose	N/A	Wang, S., Hou, Y., Chen, X., & Liu, L. (2019). Kick-starting evolution efficiency with an autonomous evolution mutation system. Metabolic Engineering, 54, 127–136. https://doi.org/10.1016/j.ymben.2019.03.010
8	acetoin	81.6	N/A	1.21 g L-1h-1	Corynebacterium glutamicum	7.5g/L peptone, 15g/L yeast extract, 7.5g/L NaCl, adjusting pH to 7.0	N/A	2L tank, 30 ℃, glucose 40g/L (glucose concentration is lower than 10g/L, 800g/L of glucose is supplemented), 70 h	glucose	ATCC13032 delta pta-acktuf-alsSD Δ ldh Δ butA Δ nagD; pEC-XK 99E-SD-. DELTA.lacIq	陈涛, 陶然, 付晶, 毛雨丰, 黄灿, 王智文, & 赵学明. (2017). Corynebacterium glutamicum strain for high yield of chiral D- (-) -acetoin and construction and application thereof.
9	acetoin	78.8	0.31	0.58 g L-1h-1	Bacillus licheniformis	100 g glucose, 33 g corn steep liquor, 9 g (NH4)2SO4, 1.31 g K2HPO4·3H2O, 3.08 g MgSO4·7H2O, 0.5 g NaCl, 0.12 g ZnCl2, 1 mg FeCl3, and 1 mg MnSO4	Aerobic	5 L bioreactor, 37 °C, 1 vvm, pH 6.0, 350 rpm (first 16h) 250 rpm (after 16h), 96h	glucose	WX-02ΔbudCΔacoR	Li, L., Wei, X., Yu, W., Wen, Z., & Chen, S. (2017). Enhancement of acetoin production from Bacillus licheniformis by 2,3-butanediol conversion strategy: Metabolic engineering and fermentation control. Process Biochemistry, 57, 35–42. https://doi.org/10.1016/j.procbio.2017.03.027
10	acetoin	78.7	N/A	1.09 g L-1h-1	Bacillus subtilis (DL11-11)	120g/L of glucose; 1.5g/L of yeast powder; (NH)4)2HPO49g/L；K2HPO48g/L；MgSO40.2 g/L; 3mL of trace element solution ; the pH was 7.0.	Aerobic	250 rpm, 0.2 vvm, pH 5.9, 58 h, 37℃	glucose	deposit number is CGMCC No. 13141	戴建英, 王壮飞, & 修志龙. (2017). Bacillus subtilis for producing (3R) -acetoin through fermentation and application thereof.
11	acetoin	76	0.421 g/g glucose	0.807 g L-1h-1	Bacillus subtilis (DL01)	sugar 120 g/l, (NH4)2HPO4 6.0 g/l, KC1 1.8 g/l, EDTA 0.51 g/l, MgSO4 7H2O 0.6 g/l, citric acid 0.2 g/l, sodium citrate 0.294 g/l, and the pH was adjusted to around 6.4	Aerobic	5-l stirring bioreactor,200 rpm (first 6 h), 300 rpm ( 6–24 h), 400 rpm (after 24 h), 37 ◦C, pH not controlled	Sugarcane molasses	accession number KP265905	Dai, J.-Y., Cheng, L., He, Q.-F., & Xiu, Z.-L. (2015). ARTICLE IN PRESS G Model High acetoin production by a newly isolated marine Bacillus subtilis strain with low requirement of oxygen supply. Process Biochemistry. https://doi.org/10.1016/j.procbio.2015.07.010
12	acetoin	75.2	0.36 g/g	1.88 g L-1h-1	Serratia marcescens	sucrose 163 g/l, ammonium citrate 12 g/l, corn steep liquor powder 9.8 g/l, KH2PO4 0.9 g/l, MgSO4 0.2 g/l, MnSO4·H2O 0.15 g/l, and FeSO4·7H2O 0.02 g/l.	Aerobic	3.7 l bioreactor, 28 °C, 1.25 vvm, 600 rpm	sucrose	S. marcesens CICC20066 using ultraviolet, Recombinant, harboring pPbud-nox	Sun, J. A., Zhang, L. Y., Rao, B., Shen, Y. L., & Wei, D. Z. (2012). Enhanced acetoin production by Serratia marcescens H32 with expression of a water-forming NADH oxidase. Bioresource Technology, 119, 94–98. https://doi.org/10.1016/j.biortech.2012.05.108
13	acetoin	73.6	N/A	0.77 g L-1h-1	Bacillus subtilis	LB medium was supplemented with 100 µg/ml ampicillin or 50 µg/ml kanamycin	Aerobic	5-L fermentor, controlled pH 6.5 (first 48h) 8 (last 48h),	glucose	Wild type strain containing pMA5-bdhA (KmR)	Zhang, X., Bao, T., Rao, Z., Taowei, Y., Xu, Z., Yang, S., & Li, H. (2014). Two-stage pH control strategy based on the pH preference of acetoin reductase regulates acetoin and 2,3-butanediol distribution in Bacillus subtilis. PLoS ONE, 9(3). https://doi.org/10.1371/journal.pone.0091187
14	acetoin	72.38	N/A	3.02 g L-1h-1	Escherichia coli	LB medium, metal ions (Mn2+, Ca2+, Fe2+, Fe3+, and Mg2+ at 2.5 and 5.0 mM)	Aerobic	pH (6.0–10.0),emperature (25–42 °C), WCW (10–60 g/L), substrate concentration (20–160 g/L),	meso-2,3-Butanediol	E. coli (pET-rrbdh-nox-vgb)	He, Y., Chen, F., Sun, M., Gao, H., Guo, Z., Lin, H., Chen, J., Jin, W., Yang, Y., Zhang, L., & Yuan, J. (2018). Efficient (3S)-acetoin and (2S, 3S)-2, 3-butanediol production from meso-2, 3-butanediol using whole-cell biocatalysis. Molecules, 23(3). https://doi.org/10.3390/molecules23030691
15	acetoin	71.7	0.32	2.87 g L-1h-1	Enterobacter aerogenes	80 g glucose, 3 g KH2PO4, 6.8 g Na2HPO4, 0.75 g KCl, 5.35 g (NH4)2SO4, 0.28 g Na2SO4, 0.26 g MgSO4·7H2O, 0.42 g citric acid, 5 g yeast extract, 10 g casein hydrolysate and 0.3 mL microelement solution (34.2 g/L ZnCl2, 2.7 g/L FeCl3·6H2O, 10 g/L MnCl2·4H2O, 0.85 g/L CuCl2·2H2O, and 0.31 g/L)	Aerobic	fed-batch, 3 L stirring bioreactor,37 °C, controlled pH 6.0, 600 rpm, 25h	glucose	ΔldhA-ΔbudC-ΔdhaD-Δgcd	Jang, J. W., Jung, H. M., Im, D. K., Jung, M. Y., & Oh, M. K. (2017). Pathway engineering of Enterobacter aerogenes to improve acetoin production by reducing by-products formation. Enzyme and Microbial Technology, 106, 114–118. https://doi.org/10.1016/j.enzmictec.2017.07.009
16	acetoin	71.5	N/A	1.63 g L-1h-1	Bacillus amyloliquefaciens (mutant E-11)	glucose (140.0 g/L), yeast extract (12.5 g/L), peptone (12.5 g/L), MgSO4 (0.4 g/L), K2HPO4 (3.0 g/L), and KH2PO4 (3.0 g/L) and (2) glucose (173.0 g/L), yeast extract (15.0 g/L), peptone (15.0 g/L), MgSO4 (0.4 g/L), K2HPO4 (3.0 g/L), and KH2PO4 (3.0 g/L)	Aerobic	7L fermentation, 4L medium, inoculum size 10% (v/v), aeration 4L/min, controlled pH 6.5, 37oC, 200 rpm	glucose	mutant E-11	Luo, Q., Wu, J., & Wu, M. (2014). Enhanced acetoin production by Bacillus amyloliquefaciens through improved acetoin tolerance. Process Biochemistry, 49(8), 1223–1230. https://doi.org/10.1016/j.procbio.2014.05.005
17	acetoin	64.2	0.412	2.38 g L-1h-1	Bacillus licheniformis (MW3)	70 g/L glucose; 1 g/L triammonium citrate; 12 g/L yeast extract; 2 g/L K2HPO4⋅3H2O; 6.5 g/L sodium acetate; 0.25 g/L MgSO4⋅7H2O; 0.0225 g/L FeSO4⋅7H2O; 0.0075 g/L ZnSO4⋅7H2O; and 0.0038 g/L MnSO4⋅H2O.	Aerobic	5-L bioreactor , 4 L medium, controlled pH 7.0, 500 rpm, 1.0 vvm	glucose	MW3 (ΔbudCΔgdh)	Lü, C., Ge, Y., Cao, M., Guo, X., Liu, P., Gao, C., Xu, P., & Ma, C. (2020). Metabolic Engineering of Bacillus licheniformis for Production of Acetoin. Frontiers in Bioengineering and Biotechnology, 8, 125. https://doi.org/10.3389/fbioe.2020.00125
18	acetoin	63	N/A	N/A	Bacillus pumilus (XH195 DSM 16187)	1 L of distilled water, 200 g of glucose, 50 g of NH4Cl, 0.50 g of KH2PO4, 4.0 g of K2HPO4.3H2O, 2.0 ml of 10 g/L of CaCl2 solution, 2.0 ml of 100 g/L of MgCl2.6H2O solution, 200 μl of 10 g/L of FeCl3 solution, 200 μl of 50 g/L of NaCl solution, 5.0 ml of 10 g/L of yeast extract solution, 5.0 ml of metal ions mixture solution, and 200 μl of vitamin mixture solution.mixture solution contained 1 L …	Aerobic	50 ml per liter in 300-ml conical flasks, 37° C, 180 rpm, 60 h	glucose	No modifications	Xu, P., Xiao, Z., Du, Y., & Wei, Z. (2005). Acetoin high-yield Bacillus pumilus strain.
19	acetoin	62.3	0.36	1.88 g L-1h-1	Klebsiella pneumoniae	glucose, 100 g/L; yeast extract, 2 g/L; corn steep liquor, 4 g/L; (NH4)2SO4, 5 g/L; sodium acetate, 3 g/L; KCl, 0.4 g/L; and MgSO4, 0.1 g/L	Aerobic	fed‑batch, 500 rpm, pH 6.5, 57h	glucose	K. pneumoniae ΔbudC–Δaco	Wang, D., Zhou, J., Chen, C., Wei, D., Shi, J., Jiang, B., Liu, P., & Hao, J. (2015). R-acetoin accumulation and dissimilation in Klebsiella pneumoniae. Journal of Industrial Microbiology and Biotechnology, 42(8), 1105–1115. https://doi.org/10.1007/s10295-015-1638-1
20	acetoin	62.2	0.34	0.864 g L-1h-1	Bacillus subtilis	LB medium,65% glucose, 30% xylose, and 5% arabinose,	Aerobic	1.3-l reactor, 37oC, 220 rpm, controlled pH 7.0, 1 vvm	Glucose, xylose and arabinose	168ARSRCPΔacoAΔbdhA with overexpression plasmid pHP13-PA-PAB	Zhang, B., Li, X., Fu, J., Li, N., Wang, Z., Tang, Y., & Chen, T. (2016). Production of Acetoin through Simultaneous Utilization of Glucose, Xylose, and Arabinose by Engineered Bacillus subtilis. PLOS ONE, 11(7), e0159298. https://doi.org/10.1371/journal.pone.0159298
21	acetoin	60.5	N/A	1.44 g L-1h-1	Serratia marcescens	sucrose 163 g/L, ammonium citrate 12 g/L, CSLP 9.8 g/L, KH2PO4 0.9 g/L, MgSO4 0.2 g/L, MnSO4·H2O 0.15 g/L, FeSO4·7H2O 0.02 g/L	Aerobic	700 rpm (first 8h) 600 rpm (after), 42h,	sucrose	S. marcesens CICC20066 using ultraviolet, Recombinant, harboring pPbud-nox	Sun, J., Zhang, L., Rao, B., Han, Y., Chu, J., Zhu, J., Shen, Y., & Wei, D. (2012). Enhanced acetoin production by serratia marcescens H32 using statistical optimization and a two-stage agitation speed control strategy. Biotechnology and Bioprocess Engineering, 17(3), 598–605. https://doi.org/10.1007/s12257-011-0587-4
22	acetoin	60.5	N/A	1.26 g L-1h-1	Bacillus subtilis	80 g/L glycerol, 5 g/L yeast extract, 2.5 g/L (NH4)2SO4, 5 g/L sodium glutamate, 5 g/L urea, 2 g/L K2HPO4, and 1 g/L KH2PO4	Aerobic	5-L fermentor,2.7 L medium, controlled pH 6.4, 37 °C	glycerol	delete bdhA, integrate alsSD	Fan, X., Wu, H., Jia, Z., Li, G., Li, Q., Chen, N., & Xie, X. (2018). Metabolic engineering of Bacillus subtilis for the co-production of uridine and acetoin. Applied Microbiology and Biotechnology, 102(20), 8753–8762. https://doi.org/10.1007/s00253-018-9316-7
23	acetoin	60.3	N/A	1.55 g L-1h-1	Escherichia coli	glucose 60 g L-1, yeast extract (AngelYeast Co. Ltd, China) 10 g L-1, sodium acetate 2 g L-1, MgSO4 0.5 g L-1, MnSO4 0.05 g L-1, KH2PO4 0.5 g L-1, ZnCl2 0.1 g L-1 and FeSO4 0.02 g L-1 at pH 7.0	Aerobic	5 L bioreactor,aeration rate of 0.5 vvm, 400 rpm, 35°C, pH 7.0, 45 mL liquid volume and 5% inoculation size, 39 h	glucose	E. coli(pAC‐NOX)	Xu, Q., Xie, L., Li, Y., Lin, H., Sun, S., Guan, X., Hu, K., Shen, Y., & Zhang, L. (2015). Metabolic engineering of Escherichia coli for efficient production of (3 R )-acetoin. Journal of Chemical Technology & Biotechnology, 90(1), 93–100. https://doi.org/10.1002/jctb.4293
24	acetoin	55.8	N/A	0.78 g L-1h-1	Bacillus subtilis	5g/L, corn steep liquor 20g/L, urea 2g/L, glucose/gluconic acid (9:1,3:7,5:5,7:3,9:1) 100g/L.The NaOH of above-mentioned fermention medium 5mol/L is regulated its pH to 6.5	Aerobic	2L tank, 37 ℃, 5% inoculum size, air flow quantity is 120m3/ hm3, 50g/L glucose and 50g/L gluconic acid	glucose, gluconic acid	deposit number is: CTCCM 209309	饶志明, 包腾, 张显, 赵晓静, 杨套伟, & 徐美娟. (2014). Method for improving acetoin yield by adding gluconic acid.
25	acetoin	50.8	N/A	N/A	Bacillus sp.H15-1	Semen Maydis starch of addition 1%, the KH of 3g/L in de-embryo Semen Maydis powder hydrolyzed solution2PO4, The sodium acetate of 0.3g/L, the CaCl of 0.2g/L2MgSO with 0.1g/L4	Aerobic	4.2L air blow tank with machinery agitation, 2L fermentation medium, 600 rpm, 0.9 vvm, pH 6.6-7.1 (first 48h), pH7.7-8.0, 50℃, 68h	degerminated corn flour hydrolysate	deposit number is CGMCC No.12389	肖梓军, 顾如林, 侯孝元, 吕新, & 赵静宜. (2016). Bacillus and application thereof to production of acetoin and 2, 3- butanediol through high temperature fermentation.
26	acetoin	35	N/A	N/A	Bacillus amyloliquifaciens (FMME044)	peptone 10 g/L, yeast powder 10 g/L, NaCl 5 g/L, K2HPO4 3 g/L, MgSO4 0.4 g/L, initial pH 7.0	Aerobic	7L fermentation, 4L liquid, inoculum size 10% (v/v), 400 rpm, 1.0 vvm, no pH control, 37oC, glucose 120 g/L	glucose	Sequance provided in patent	刘立明, 张燕婕, 李树波, & 陈坚. (2012). Screening method of strain capable of producing acetoin and acetoin production method based on strain fermenting method.
27	Acetoin	56.7		0.639 g/L/h	B. subtilus	LB medium		glucose 150 g/l, beef extract 5 g/l, corn steep liquor 6 g/l, urea 2 g/l, pH 6.8) in a 5-L fermentor, 300 rpm and pH of 6.8		BMN	X. Zhang et al., "The rebalanced pathway significantly enhances acetoin production by disruption of acetoin reductase gene and moderate-expression of a new water-forming NADH oxidase in Bacillus subtilis," Metab Eng, vol. 23, pp. 34-41, May 2014, doi: 10.1016/j.ymben.2014.02.002
28	Acetoin	51.2	0.43	1.42 g L_1 h_1	Bacillus amyloliquefaciens	120 g L_1 glucose, 10 g L_1 yeast extract, 10 g L_1 peptone, 0.2 g L_1 MgSO4, 3 g L_1 K2HPO4, 3 g L_1 KH2PO4 and 5 g L_1 NaCl		2 speed agitation control (350 rpm for 24 hours followed by 500 rpm) 7-L jar fermentor, 4.4 L working volume, 10% (v/v) inoculation size, pH was not controlled; aeration rate 4 L min_1, 2 speed agitation control (350 rpm for 24 hours followed by 500 rpm)		FMME044	Y. Zhang, S. Li, L. Liu, and J. Wu, "Acetoin production enhanced by manipulating carbon flux in a newly isolated Bacillus amyloliquefaciens," Bioresour Technol, vol. 130, pp. 256-60, Feb 2013, doi: 10.1016/j.biortech.2012.10.036
29	Acetoin	56	N/A	0.8 g/L/h	Bacillus subtilis	The composition of the fermentation medium (g/l) was as follows: glucose 100, yeast extract 5.0, corn steep liquor 15, ammonium sulfate 5.0, and manganese sulfate 0.05.		(g/l) (50 ml medium in a 500 ml Erlenmeyer flask) and incubated on a rotary vibrator at 180 rpm and 37°C for 72 h.		TH-49	H. Xu, S. Jia, and J. Liu, "Production of acetoin by bacillus subtilis TH-49," IEEE, vol. 6, 11, pp. 1524-1527, 2011.
30	Acetoin	53.9	0.36	0.75 g/L/h	Bacillus subtilis	per liter: glucose 100 g, beef extract 5 g, corn steep liquor 6 g, urea 2 g		50 mL fermentation, 6 % (v/v), rotary shaker at 160 rpm		JNA-UD-6	X. Zhang et al., "Mutation breeding of acetoin high producing Bacillus subtilis blocked in 2,3-butanediol dehydrogenase," World J Microbiol Biotechnol, vol. 29, no. 10, pp. 1783-9, Oct 2013, doi: 10.1007/s11274-013-1339-8
31	acetoin	55.2	0.37	2.69 g/L/h	Enterobacter cloacae	M9 minimal medium18 supplemented with 5 g L-1 111 yeast extract		7.5-L bioreactor (CelliG 310, NBS, USA) with an initial glucose concentration of 80 g L-1 200 and broth volume of 4 L. Both 201 cultivations were performed at 37ÅãC with an aeration rate of 1 vvm and agitation 202 speed of 500 rpm.		SDM 53	L. Zhang et al., "Biotechnological production of acetoin, a bio-based platform chemical, from a lignocellulosic resource by metabolically engineered Enterobacter cloacae," Green Chemistry, vol. 18, no. 6, pp. 1560-1570, 2016, doi: 10.1039/c5gc01638j
32	Acetoin	12.9	0.403	0.31 g/L/h	Lactococcus lactis	synthetic amino-acid (SA) medium, 40 mM MOPS buffer was replaced with 30 mM β- glycerophosphate disodium, supplemented with 0.2 % (w/v) yeast extract (SA + yeast extract (SAY) medium)		180 mM glucose, 30 °C and 200 rpm,		Abk1503	J. Liu, V. Kandasamy, A. Wurtz, P. R. Jensen, and C. Solem, "Stimulation of acetoin production in metabolically engineered Lactococcus lactis by increasing ATP demand," Appl Microbiol Biotechnol, vol. 100, no. 22, pp. 9509-9517, Nov 2016, doi: 10.1007/s00253-016-7687-1
33	Acetoin	31	0.46	0.43 g/L/h	E. coli	M9 medium supplemented with 5 g/L yeast extract		1% v/v inoculum, 30 1C with vigorous shaking.		mlc-XT7- LAFC-YSD	N. Nakashima, H. Akita, and T. Hoshino, "Establishment of a novel gene expression method, BICES (biomass-inducible chromosome-based expression system), and its application to the production of 2,3-butanediol and acetoin," Metab Eng, vol. 25, pp. 204-14, Sep 2014, doi: 10.1016/j.ymben.2014.07.011
34	1-propanol	10.8	0.107	0.144 g L-1 h-1	Escherichia coli	20 g/L glucose, 20 g/L (NH4)2SO4, 2.0 g/L KH2PO4, 0.4 g/L MgSO4.7H2O, 3 g/L yeast extract, 5 mL trace metal solution	Aerobic	6.6L fermentation containing 2L of semi-defined medium	glucose	pBRthrABC-tac-cimA-tac-ackA, pTacDA-tacadhEmut	Y. Jun Choi, J. Hwan Park, T. Yong Kim, and S. Yup Lee, “Metabolic engineering of Escherichia coli for the production of 1-propanol,” Metab. Eng., vol. 14, no. 5, pp. 477–486, Sep. 2012
35	1-propanol	8	0.15	2.5 g/L/day	Escherichia coli	M9 medium	micro-aerobic	250 mL screw cap flask	glucose	BW25113, F' [traD36, proAB+, laclqZdeltaM15(TetR),deltailvB, deltailvI, deltaleuA, deltaadhE, deltaldhA, deltafrdA, deltapta	C. R. Shen and J. C. Liao, “Synergy as design principle for metabolic engineering of 1-propanol production in Escherichia coli,” Metab. Eng., vol. 17, no. 1, pp. 12–22, May 2013.
36	1-propanol	2.8	0.13	N/A	Methanococcus jannaschii	M9 medium	micro-aerobic	251 mL screw cap flask	glucose	psA142, p15A ori; Kanr;PLlacO1::cimA3.7-leuABCD	S. Atsumi and J. C. Liao, "Directed evolution of Methanococcus jannaschii citramalate synthase for biosynthesis of 1-propanol and 1-butanol by Escherichia coli," Appl Environ Microbiol, vol. 74, no. 24, pp. 7802-8, Dec 2008, doi: 10.1128/AEM.02046-08.
37	1-propanol	0.13	N/A	N/A	Escherichia coli	M9 medium supplemented with 2-ketobutyrate		250-ml screw-cap conical flasks, 0.2M glucose plus 0.1mM IPTG at 30 degC, rotary shaker (250 r.p.m.)		JCL260	S. Atsumi, T. Hanai, and J. C. Liao, "Non-fermentative pathways for synthesis of branched-chain higher alcohols as biofuels," Nature, vol. 451, no. 7174, pp. 86-9, Jan 3 2008, doi: 10.1038/nature06450.
38	1-propanol	0.72	0.011	N/A	Cornebacterium glutamicum	CGXII, 5 g/L ammonium sulfate		51 mL in 500-mL baffled flasks at 30 °C and 120 rpm		ΔhdpAΔldh(pEKEx3-mgsAyqhD- gldA)(pVWEx1-ppdABC)	D. Siebert and V. F. Wendisch, "Metabolic pathway engineering for production of 1,2-propanediol and 1-propanol by Corynebacterium glutamicum," Biotechnol Biofuels, vol. 8, p. 91, 2015, doi: 10.1186/s13068-015-0269-0.
39	1-propanol	2.91	N/A	N/A	Escherichia coli	(per liter): 40 g glucose, 5 g NaCl, 5 g yeast extract, 1 g NH4Cl, 1.5 g KCl, 0.2 g MgCl2, 0.07 g Na2SO4, and 0.005 g FeCl3	Aerobic	Aerobic shake flask, 150 mL serum bottles, 20 mL working volume, 37 °C, 250 rpm		RJ57/pRJ70 + pRJ58 (C-120 h)	R. Jain, X. Sun, Q. Yuan, and Y. Yan, "Systematically engineering Escherichia coli for enhanced production of 1,2-propanediol and 1-propanol," ACS Synth Biol, vol. 4, no. 6, pp. 746-56, Jun 19 2015, doi: 10.1021/sb500345t
40	1-butanol	0.39	0.018	N/A	Methanococcus jannaschii	M9 medium	micro-aerobic	252 mL screw cap flask	glucose	psA142, p15A ori; Kanr;PLlacO1::cimA3.7-leuABCD	S. Atsumi and J. C. Liao, "Directed evolution of Methanococcus jannaschii citramalate synthase for biosynthesis of 1-propanol and 1-butanol by Escherichia coli," Appl Environ Microbiol, vol. 74, no. 24, pp. 7802-8, Dec 2008, doi: 10.1128/AEM.02046-08.
41	Butanol	16	0.31	N/A	Clostridium tyrobutyricum ATCC 25755	P2 medium	Anaerobic	Serum bottle cotaining 40mL of P2 medium inoculated with 0.4mL of cells from an overnight culture in RCM @37 degC, and pH maintained between 5.0 and 6.5	glucose	adhE2 expressed, Δack	M. Yu, Y. Zhang, I. C. Tang, and S. T. Yang, "Metabolic engineering of Clostridium tyrobutyricum for n-butanol production," Metab Eng, vol. 13, no. 4, pp. 373-82, Jul 2011, doi: 10.1016/j.ymben.2011.04.002.
42	1-butanol	30	0.48	0.18	Escherichia coli	TB medium	Anaerobic	Fed-batch 1L stir tank reactor, 0.35L working volume, 30 degC, pH controlled at 6.8		BW25113 PLlacO1::terFS(M11K) Cola ori Kanr	C. R. Shen, E. I. Lan, Y. Dekishima, A. Baez, K. M. Cho, and J. C. Liao, "Driving forces enable high-titer anaerobic 1-butanol synthesis in Escherichia coli," Appl Environ Microbiol, vol. 77, no. 9, pp. 2905-15, May 2011, doi: 10.1128/AEM.03034-10.
43	Butanol	18.9	0.71	1.32 g/L/h	Clostridium acetobutylicum	Clostridial growth medium	Anaerobic	Fed-batch 5L bioreactor, 4 L working volume, 1.2L CGM, 20-30 g/L glucose		BEKW(pPthlAAD**)	Y. S. Jang et al., "Enhanced butanol production obtained by reinforcing the direct butanol-forming route in Clostridium acetobutylicum," mBio, vol. 3, no. 5, pp. e00314-12, Oct 23 2012, doi: 10.1128/mBio.00314-12.
44	Butanol	20.5 g/L	0.33	0.32 g/L/h	Clostridium tyrobutyricum	rich P2 medium	Anaerobic	Serum bottles, 40 ml medium at 37 degC, pH between 5.0 and 6.5		pBP1, catP, ColE1, TraJ with Pthl and adhE2	M. Yu, Y. Du, W. Jiang, W. L. Chang, S. T. Yang, and I. C. Tang, "Effects of different replicons in conjugative plasmids on transformation efficiency, plasmid stability, gene expression and n-butanol biosynthesis in Clostridium tyrobutyricum," Appl Microbiol Biotechnol, vol. 93, no. 2, pp. 881-9, Jan 2012, doi: 10.1007/s00253-011-3736-y.
45	Butanol	14.86	0.336	0.206 g/L/h	Clostridium acetobutylicum	Rich P2 medium	Anaerobic	Anaerobic 7L jar fermenter, 37 degC, pH maintained at5.5 during solventogenesis, 200 rpm agitation rate		824adc::gsh Sol-EC	X. Hou et al., "Engineering Clostridium acetobutylicum for alcohol production," J Biotechnol, vol. 166, no. 1-2, pp. 25-33, Jun 20 2013, doi: 10.1016/j.jbiotec.2013.04.013.
46	n-Butanol	14.0 g/L	0.33	2 g/gDW/h	Escherichia coli	Minimal medium	Anaerobic	50 ml baffeled flask, 30 ml working volume, 30 degC, 200 rpm rotary shaker		RB02 DyqhD DeutE [yqeF1fucO1]	C. Dellomonaco, J. M. Clomburg, E. N. Miller, and R. Gonzalez, "Engineered reversal of the beta-oxidation cycle for the synthesis of fuels and chemicals," Nature, vol. 476, no. 7360, pp. 355-9, Aug 10 2011, doi: 10.1038/nature10333.
47	butanol	151.7	0.47	1.16 g/L/h (total solvent)	Clostridium beijerinkii	P2 medium	Anaerobic	Anaerobic 2L batch bioreactor, 99.9 g/L glucose, gas stripping column for product recovery	glucose	BA101	T. C. Ezeji, N. Qureshi, and H. P. Blaschek, "Acetone butanol ethanol (ABE) production from concentrated substrate: reduction in substrate inhibition by fed-batch technique and product inhibition by gas stripping," Appl Microbiol Biotechnol, vol. 63, no. 6, pp. 653-8, Feb 2004, doi: 10.1007/s00253-003-1400-x.
48	1-butanol	0.29	N/A	N/A	Escherichia coli	M9 medium supplemented 2-ketovalerate		250-ml screw-cap conical flasks, 0.2M glucose plus 0.1mM IPTG at 30 degC, rotary shaker (250 r.p.m.)	glucose	JCL260	S. Atsumi, T. Hanai, and J. C. Liao, "Non-fermentative pathways for synthesis of branched-chain higher alcohols as biofuels," Nature, vol. 451, no. 7174, pp. 86-9, Jan 3 2008, doi: 10.1038/nature06450.
49	n-butanol	0.04	N/A	N/A	Clostridium cellulolyticum	CM3 medium, comprising 1.3 g/L (NH4)2SO4, 1.5 g/L KH2PO4, 2.9 g/L K2HPO4∙3H2O, 0.2 g/L MgCl2∙6H2O, 0.075 g/L CaCl2∙2H2O, 1.25 mg/L FeSO4∙7H2O, 1 mg/L resazurin, 2 g/L yeast extract, 0.5 g/L cysteine and either 6 g/L cellobiose or 12 g/L crystalline cellulose (Avicel PH101) as the carbon source	Anaerobic	pH 7.2 with 5 % Na2CO3 after steri-lization and medium was deoxygenated under an anaerobic atmosphere (5 % H2, 10 % CO2, 85 % N2) grown under anaerobic conditions at 34 °C.	Cellulose	E. coli atoB and C. acetobutylicum hbd, crt, bcd and adhE2 genes	S. M. Gaida, A. Liedtke, A. H. W. Jentges, B. Engels, and S. Jennewein, “Metabolic engineering of Clostridium cellulolyticum for the production of n-butanol from crystalline cellulose,” Microb. Cell Fact., vol. 15, no. 1, Jan. 2016
50	n-butanol	0.12	N/A	N/A	Clostridium cellulolyticum	CM3 medium, comprising 1.3 g/L (NH4)2SO4, 1.5 g/L KH2PO4, 2.9 g/L K2HPO4∙3H2O, 0.2 g/L MgCl2∙6H2O, 0.075 g/L CaCl2∙2H2O, 1.25 mg/L FeSO4∙7H2O, 1 mg/L resazurin, 2 g/L yeast extract, 0.5 g/L cysteine and either 6 g/L cellobiose or 12 g/L crystalline cellulose (Avicel PH101) as the carbon source	Anaerobic	pH 7.2 with 5 % Na2CO3 after steri-lization and medium was deoxygenated under an anaerobic atmosphere (5 % H2, 10 % CO2, 85 % N2) grown under anaerobic conditions at 34 °C.	Crystalline cellulose	E. coli atoB and C. acetobutylicum hbd, crt, bcd and adhE2 genes	S. M. Gaida, A. Liedtke, A. H. W. Jentges, B. Engels, and S. Jennewein, “Metabolic engineering of Clostridium cellulolyticum for the production of n-butanol from crystalline cellulose,” Microb. Cell Fact., vol. 15, no. 1, Jan. 2016
51	Acetone	77.7	0.47	1.16 g/L/h (total solvent	Clostridium beijerinkii	P2 medium	Anaerobic	Anaerobic 2L batch bioreactor, 99.9 g/L glucose, gas stripping column for product recovery	glucose	BA101	T. C. Ezeji, N. Qureshi, and H. P. Blaschek, "Acetone butanol ethanol (ABE) production from concentrated substrate: reduction in substrate inhibition by fed-batch technique and product inhibition by gas stripping," Appl Microbiol Biotechnol, vol. 63, no. 6, pp. 653-8, Feb 2004, doi: 10.1007/s00253-003-1400-x.
52	Propionate	0.804	N/A	N/A	Escherichia coli	LB medium supplemented with 50 mg/L ampicillin, 50 mg/L streptomycin, 34 mg/L chloramphenicol, and 25 mg/L kanamycin	Anaerobic	3 mL TB medium supplemented with 10 g/L glucose or 10 g/L glycerol at an inoculation volume of 10% in 15 mL Falcon tubes. Cultures were induced with 0.5 mM IPTG at 2 h	glucose	Pal25	H. C. Tseng and K. L. Prather, "Controlled biosynthesis of odd-chain fuels and chemicals via engineered modular metabolic pathways," Proc Natl Acad Sci U S A, vol. 109, no. 44, pp. 17925-30, Oct 30 2012, doi: 10.1073/pnas.1209002109.
53	3-hydroxyvalerate	0.869	N/A	N/A	Escherichia coli	TB medium supplemented with 50 mg/L ampicillin, 50 mg/L streptomycin, 34 mg/L chloramphenicol, and 25 mg/L kanamycin	Aerobic	Aerobic 50 mL TB medium in 250-mL flask, microaerobic 13 mL TB medium, anaerobic 15-mL glass tubes, 10 g/L glucose in all cases, 30 degC	glucose	Pal3	H. C. Tseng and K. L. Prather, "Controlled biosynthesis of odd-chain fuels and chemicals via engineered modular metabolic pathways," Proc Natl Acad Sci U S A, vol. 109, no. 44, pp. 17925-30, Oct 30 2012, doi: 10.1073/pnas.1209002109.
54	trans-2-pentenoate	0.57	N/A	N/A	Escherichia coli	TB medium supplemented with 50 mg/L ampicillin, 50 mg/L streptomycin, 34 mg/L chloramphenicol, and 25 mg/L kanamycin	Aerobic	Aerobic 50 mL TB medium in 250-mL flask, microaerobic 13 mL TB medium, anaerobic 15-mL glass tubes, 10 g/L glucose in all cases, 30 degC	glucose	Pal3	H. C. Tseng and K. L. Prather, "Controlled biosynthesis of odd-chain fuels and chemicals via engineered modular metabolic pathways," Proc Natl Acad Sci U S A, vol. 109, no. 44, pp. 17925-30, Oct 30 2012, doi: 10.1073/pnas.1209002109.
55	valerate	0.554	N/A	N/A	Escherichia coli	TB medium supplemented with 50 mg/L ampicillin, 50 mg/L streptomycin, 34 mg/L chloramphenicol, and 25 mg/L kanamycin		3 mL TB medium supplemented with 10 g/L glucose or 10 g/L glycerol at an inoculation volume of 10% in 15 mL Falcon tubes. Cultures were induced with 0.5 mM IPTG at 2 h	glucose, glycerol	Pal12	H. C. Tseng and K. L. Prather, "Controlled biosynthesis of odd-chain fuels and chemicals via engineered modular metabolic pathways," Proc Natl Acad Sci U S A, vol. 109, no. 44, pp. 17925-30, Oct 30 2012, doi: 10.1073/pnas.1209002109.
56	pentanol	1.317	0.489	N/A	Escherichia coli	TB medium supplemented with 50 mg/L ampicillin, 50 mg/L streptomycin, 34 mg/L chloramphenicol, and 25 mg/L kanamycin		45 mL TB medium supplemented with 10 g/L glucose at an inoculation volume of 10% in 50-mL 0.5 mM isfopropyl- β-D-thiogalactopyranoside (IPTG) at 2 h postinoculation trans-2-pentenoate (2 g/L) sumplementee at time of induction	glucose	BL12	H. C. Tseng and K. L. Prather, "Controlled biosynthesis of odd-chain fuels and chemicals via engineered modular metabolic pathways," Proc Natl Acad Sci U S A, vol. 109, no. 44, pp. 17925-30, Oct 30 2012, doi: 10.1073/pnas.1209002109.
57	3-hydroxyvalerate	2.051	N/A	N/A	Escherichia coli	LB medium supplemented with 50 mg/L ampicillin, 50 mg/L streptomycin, and 30 mg/L kanamycin	Aerobic	Aerobic, 50 mL LB medium supplemented with 20 g/L glucose or 20 g/L glycerol at an inoculation volume of 2% in 250 mL flasks., 30 deg C	glucose, glycerol	HCT 20	H. C. Tseng, C. L. Harwel, C. H. Martin, and K. L. Prather, "Biosynthesis of chiral 3-hydroxyvalerate from single propionate-unrelated carbon sources in metabolically engineered E. coli," Microbial Cell Factories, vol. 9, 96, pp. 1-12, 2010.
58	(S)-3-Methyl-1-pentanol	0.794	N/A	N/A	Escherichia coli	M9 medium	Aerobic	Aerobic, 125 mL flask, 20 g/L glucose plus 0.1 mM IPTG at 30 °C	glucose	LeuA: G462D/S139G KIVD: V461A/F381L	K. Zhang, M. R. Sawaya, D. S. Eisenberg, and J. C. Liao, "Expanding metabolism for biosynthesis of nonnatural alcohols," Proc Natl Acad Sci U S A, vol. 105, no. 52, pp. 20653-8, Dec 30 2008, doi: 10.1073/pnas.0807157106.
59	1-pentanol	2.2	N/A	N/A	Escherichia coli	M9 medium	Aerobic	Aerobic, 125 mL flask, 20 g/L glucose plus 0.1 mM IPTG at 30 °C	glucose	EcLeuA S139G, G462D, G462D	R. J. Marcheschi et al., "A synthetic recursive "+1" pathway for carbon chain elongation," ACS Chem Biol, vol. 7, no. 4, pp. 689-97, Apr 20 2012, doi: 10.1021/cb200313e.
60	1-hexanol	0.3	N/A	N/A	Escherichia coli	M9 medium	Aerobic	Aerobic, 125 mL flask, 20 g/L glucose plus 0.1 mM IPTG at 30 °C	glucose	EcLeuA H97A, S139G, G462D, G462D	R. J. Marcheschi et al., "A synthetic recursive "+1" pathway for carbon chain elongation," ACS Chem Biol, vol. 7, no. 4, pp. 689-97, Apr 20 2012, doi: 10.1021/cb200313e.
61	1-heptanol	0.08	N/A	N/A	Escherichia coli	M9 medium	Aerobic	Aerobic, 125 mL flask, 20 g/L glucose plus 0.1 mM IPTG at 30 °C	glucose	EcLeuA H97A, S139G, N167G, P169A, G462D, G462D	R. J. Marcheschi et al., "A synthetic recursive "+1" pathway for carbon chain elongation," ACS Chem Biol, vol. 7, no. 4, pp. 689-97, Apr 20 2012, doi: 10.1021/cb200313e.
62	1-octanol	0.002	N/A	N/A	Escherichia coli	M9 medium	Aerobic	Aerobic, 125 mL flask, 20 g/L glucose plus 0.1 mM IPTG at 30 °C	glucose	EcLeuA H97A, S139G, N167G, P169A, G462D, G462D	R. J. Marcheschi et al., "A synthetic recursive "+1" pathway for carbon chain elongation," ACS Chem Biol, vol. 7, no. 4, pp. 689-97, Apr 20 2012, doi: 10.1021/cb200313e.
63	1-hexanol	0.047	N/A	N/A	Escherichia coli	TB+2% glucose medium, 37 degC	Anaerobic	Anaerobic 10 mL sealed tube, 5 mL working volume, 37 degC			Y. Dekishima, E. I. Lan, C. R. Shen, K. M. Cho, and J. C. Liao, "Extending carbon chain length of 1-butanol pathway for 1-hexanol synthesis from glucose by engineered Escherichia coli," J Am Chem Soc, vol. 133, no. 30, pp. 11399-401, Aug 3 2011, doi: 10.1021/ja203814d.
64	n-hexanol	0.47	N/A	N/A	Escherichia coli	LB medium, 1%glucose, 100 mM isopropy-b- D-thiogalactopyranoside(IPTG)	Anaerobic	Anaerobic 10 mL BD Vacutainer tube, 37 degC, 250 rpm		llacOp1::Eco.atoB Cac.adhE2Cac.crtReu.paaH1*; ColE1ori;AmpR	H. B. Machado, Y. Dekishima, H. Luo, E. I. Lan, and J. C. Liao, "A selection platform for carbon chain elongation using the CoA-dependent pathway to produce linear higher alcohols," Metab Eng, vol. 14, no. 5, pp. 504-11, Sep 2012, doi: 10.1016/j.ymben.2012.07.002.
65	hexanol	0.94	N/A	N/A	Clostridium carboxidivorans	Base defined medium, -Cu/+10x Mo	Anaerobic	Anaerobic, shaken serum bottles, 37 _C		Strain P7	J. R. Phillips et al., "Butanol and hexanol production in Clostridium carboxidivorans syngas fermentation: Medium development and culture techniques," Bioresour Technol, vol. 190, pp. 114-21, Aug 2015, doi: 10.1016/j.biortech.2015.04.043.
66	1-octanol	0.062	0.012	0.0044g/L/h	Escherichia coli	M9-based medium with vitamins and metals	Aerobic	Aerobic, 30 degC, 150rpm		BL21(DE3), tes, sfp, car, ahr	M. K. Akhtar, H. Dandapani, K. Thiel, and P. R. Jones, "Microbial production of 1-octanol: A naturally excreted biofuel with diesel-like properties," Metab Eng Commun, vol. 2, pp. 1-5, Dec 2015, doi: 10.1016/j.meteno.2014.11.001.
67	2-butanol	1.03	N/A	N/A	Klebsiella pneumoniae	(g/L) 60 glucose, 4 (NH4)2SO4, 5 yeast extract, 0.2 MgSO4_7H20, 0.4 KCl, 5 KH2PO4, 0.02 FeSO4_7H20, 0.02 MnSO4_7H20, 0.02 ZnSO4_7H20, 30 CaCO3.		250 mL conical flasks containing 100 mL LB medium with different concentrations of butanol isomers (0 g/L, 10 g/L, 20 g/L, and 30 g/L). The cultivation was maintained at 37 _C and 150 rpm		pHSG298 containing pduCDEGH Q337A gene from Lactobacillus brevis and adh gene from Clostridium autoethanogenum	Z. Chen, Y. Wu, J. Huang, and D. Liu, "Metabolic engineering of Klebsiella pneumoniae for the de novo production of 2-butanol as a potential biofuel," Bioresour Technol, vol. 197, pp. 260-5, Dec 2015, doi: 10.1016/j.biortech.2015.08.086.
68	2-butanol	0.004	N/A	N/A	Saccharomyces cerevisiae	CBS medium	Anaerobic	Anaerobic, 100 ml shake flasks (20 ml of culture at 30uC, pH 5		pduGH-construct and KanMX4 flanked by homology domains to DAK2 downstream sequence	P. Ghiaci, J. Norbeck, and C. Larsson, "2-Butanol and butanone production in Saccharomyces cerevisiae through combination of a B12 dependent dehydratase and a secondary alcohol dehydrogenase using a TEV-based expression system," PLoS One, vol. 9, no. 7, p. e102774, 2014, doi: 10.1371/journal.pone.0102774.
69	Butanone	0.002	N/A	N/A	Saccharomyces cerevisiae	CBS medium	Anaerobic	Anaerobic, 100 ml shake flasks (20 ml of culture at 30uC, pH 5		pduGH-construct and KanMX4 flanked by homology domains to DAK2 downstream sequence	P. Ghiaci, J. Norbeck, and C. Larsson, "2-Butanol and butanone production in Saccharomyces cerevisiae through combination of a B12 dependent dehydratase and a secondary alcohol dehydrogenase using a TEV-based expression system," PLoS One, vol. 9, no. 7, p. e102774, 2014, doi: 10.1371/journal.pone.0102774.
70	Isopropanol	13.6	0.17	0.62 g/L/h	Escherichia coli	Complex SD8 medium	Aerobic	Aerobic fed-batch, 500 mL baffled flask, 50 mL medium, 30 mM glucose, 250 rpm, 37 degC	glucose	E. coli-pCRC202	T. Jojima, M. Inui, and H. Yukawa, "Production of isopropanol by metabolically engineered Escherichia coli," Appl Microbiol Biotechnol, vol. 77, no. 6, pp. 1219-24, Jan 2008, doi: 10.1007/s00253-007-1246-8.
71	Isopropanol	40.1	0.36		Escherichia coli	SD-8 medium, 2-4% glucose	Aerobic	Aerobic, fed back, 30 °C using a rotary shaker (250 rpm), pH > 5.0 with gas stripper for recocery	glucose	strain TA76	K. Inokuma, J. C. Liao, M. Okamoto, and T. Hanai, "Improvement of isopropanol production by metabolically engineered Escherichia coli using gas stripping," J Biosci Bioeng, vol. 110, no. 6, pp. 696-701, Dec 2010, doi: 10.1016/j.jbiosc.2010.07.010.
72	Isobutanol	13	0.2	0.32 g/L/h	Corynebacterium glutamicum	CGXII medium	Aerobic	Aerobic Fed-batch fermentations were performed at 30°C in 300-ml cultures, pH 7.4	glucose	􏰃aceE 􏰃pqo 􏰃ilvE 􏰃ldhA 􏰃mdh(pJC4ilvBNCD-pntAB)(pBB1kivd-adhA)	B. Blombach et al., "Corynebacterium glutamicum tailored for efficient isobutanol production," Appl Environ Microbiol, vol. 77, no. 10, pp. 3300-10, May 2011, doi: 10.1128/AEM.02972-10.
73	Isobutanol	22	N/A	N/A	Escherichia coli	LB medium	Aerobic	Aerobic, 250-mL screw-cap flask containing 25 mL of Luria-Bertani media with antibiotics (0.05 g/L kanamycin and 0.1 g/L ampicillin)	glucose	JCL260 carrying pSA65/pSA69 plasmids	A. Baez, K. M. Cho, and J. C. Liao, "High-flux isobutanol production using engineered Escherichia coli: a bioreactor study with in situ product removal," Appl Microbiol Biotechnol, vol. 90, no. 5, pp. 1681-90, Jun 2011, doi: 10.1007/s00253-011-3173-y.
74	Isobutanol	0.74	N/A	N/A	Escherichia coli	M9 medium supplemented 2-keto-isovalerate		250-ml screw-cap conical flasks, 0.2M glucose plus 0.1mM IPTG at 30 degC, rotary shaker (250 r.p.m.)	glucose	JCL260	S. Atsumi, T. Hanai, and J. C. Liao, "Non-fermentative pathways for synthesis of branched-chain higher alcohols as biofuels," Nature, vol. 451, no. 7174, pp. 86-9, Jan 3 2008, doi: 10.1038/nature06450.
75	2-methyl-1-butanol	0.47	N/A	N/A	Escherichia coli	M9 medium supplemented 2-keto-3-methyl-valerate		250-ml screw-cap conical flasks, 0.2M glucose plus 0.1mM IPTG at 30 degC, rotary shaker (250 r.p.m.)	glucose	JCL260	S. Atsumi, T. Hanai, and J. C. Liao, "Non-fermentative pathways for synthesis of branched-chain higher alcohols as biofuels," Nature, vol. 451, no. 7174, pp. 86-9, Jan 3 2008, doi: 10.1038/nature06450.
76	3-methyl-1-butanol	0.33	N/A	N/A	Escherichia coli	M9 medium supplemented 2-keto-4-methyl-pentanoate		250-ml screw-cap conical flasks, 0.2M glucose plus 0.1mM IPTG at 30 degC, rotary shaker (250 r.p.m.)	glucose	JCL260	S. Atsumi, T. Hanai, and J. C. Liao, "Non-fermentative pathways for synthesis of branched-chain higher alcohols as biofuels," Nature, vol. 451, no. 7174, pp. 86-9, Jan 3 2008, doi: 10.1038/nature06450.
77	2-phenylethanol	0.89	N/A	N/A	Escherichia coli	M9 medium supplemented phenylpyruvate		250-ml screw-cap conical flasks, 0.2M glucose plus 0.1mM IPTG at 30 degC, rotary shaker (250 r.p.m.)	glucose	JCL260	S. Atsumi, T. Hanai, and J. C. Liao, "Non-fermentative pathways for synthesis of branched-chain higher alcohols as biofuels," Nature, vol. 451, no. 7174, pp. 86-9, Jan 3 2008, doi: 10.1038/nature06450.
78	Isobutanol	7.64	0.12	0.16 g/L/h	Escherichia coli	1x M9 salts, 5 g/L yeast extract, 1 mM, MgSO4, 0.1mMCaCl2, and 40 g/L glucose or cellobiose.		37 °C, 250 rpm	cellobiose	AL17 PLlacO1::kivd-adhA, PLlacO1::alsS-ilvCD, PLtetO1::bglC	S. H. Desai, C. A. Rabinovitch-Deere, Y. Tashiro, and S. Atsumi, "Isobutanol production from cellobiose in Escherichia coli," Appl Microbiol Biotechnol, vol. 98, no. 8, pp. 3727-36, Apr 2014, doi: 10.1007/s00253-013-5504-7.
79	Isobutanol	5.4	N/A	N/A	Clostridium thermocellum	LC medium		Anaerobic 5mLcentrifuge tubes with 3mL of LC medium, H7.5, 50 degC		DSM1313 Δhpt ilvBN: Prpi: kivdLL – _Ppck: ilvBNCCT – _PilvD: ilvDCT	P. P. Lin et al., "Consolidated bioprocessing of cellulose to isobutanol using Clostridium thermocellum," Metab Eng, vol. 31, pp. 44-52, Sep 2015, doi: 10.1016/j.ymben.2015.07.001.
80	Isopentenol	9.5	0.11	N/A	Escherichia coli	M9 medium	Anaerobic	20 mL of fresh medium in 250-mL screw cap flasks and grown at 37°C in a rotary shaker	glucose	AL2	M. R. Connor, A. F. Cann, and J. C. Liao, "3-Methyl-1-butanol production in Escherichia coli: random mutagenesis and two-phase fermentation," Appl Microbiol Biotechnol, vol. 86, no. 4, pp. 1155-64, Apr 2010, doi: 10.1007/s00253-009-2401-1
81	1,2-propaendiol	4.6	0.14	N/A	Cornebacterium glutamicum	CGXII, 5 g/L ammonium sulfate		50 mL in 500-mL baffled flasks at 30 °C and 120 rpm		ΔhdpAΔldh(pEKEx3-mgsA-yqhD-gldA)	D. Siebert and V. F. Wendisch, "Metabolic pathway engineering for production of 1,2-propanediol and 1-propanol by Corynebacterium glutamicum," Biotechnol Biofuels, vol. 8, p. 91, 2015, doi: 10.1186/s13068-015-0269-0.
82	1,2-propaendiol	9.5	0.568	N/A	Clostridum thermosaccharolyticum	g/l: K2HPO4, 2.90; EH2PO 4 ,1.50; M~CI'6H20 , 1.40; (NH4)2SO4, 1.30; NaCl, 1.00; CaCI2"H20 , 0.13; FeSO4-7H20 , 0.005; and yeast extract (DIFfD), 5.00. L-cysteine'HCl, 0.50 g/l, sodium resazurin, 0.002 g/l	Anaerobic	2.5 1 fermentor with a 2 1 working volume, 10% v/v inoculum, agitation speed was mantained at 30 rpm, 30.0 g/l glucose, 60degC, pH" 6.8.	glucose	ATC 31960	F. Sanchez-Riera, D. C. Cameron, and C. L. Cooney, "Influence of environmental factors in the production of R(-)-1,2-propanediol by Clostridium thermosaccharolyticum," Biotechnology Letters, vol. 9, 7, pp. 449-454, 1987.
83	1,2-propanediol	5.6	0.213	N/A	Escherichia coli	Minimal media, 10 g/L glycerol, 10 g/L tryptone, 5 g/L yeast extract, and 1.32mM Na2HPO4	Anaerobic	Anaerobic, 500mL working volume, 37 degC, pH 7.5	Glycerol	MG1655 DackA-ptaDldhADdhaK (pTHKLcfgldAmgsAyqhD)	J. M. Clomburg and R. Gonzalez, "Metabolic engineering of Escherichia coli for the production of 1,2-propanediol from glycerol," Biotechnol Bioeng, vol. 108, no. 4, pp. 867-79, Apr 2011, doi: 10.1002/bit.22993.
84	1,2-propanediol	5.13	0.48	N/A	Escherichia coli	(per liter): 40 g glucose, 5 g NaCl, 5 g yeast extract, 1 g NH4Cl, 1.5 g KCl, 0.2 g MgCl2, 0.07 g Na2SO4, and 0.005 g FeCl3	Aerobic	Aerobic shake flask, 150 mL serum bottles, 20 mL working volume, 37 °C, 250 rpm	glucose	RJ57/pRJ70 + pRJ58 (C-120 h)	R. Jain, X. Sun, Q. Yuan, and Y. Yan, "Systematically engineering Escherichia coli for enhanced production of 1,2-propanediol and 1-propanol," ACS Synth Biol, vol. 4, no. 6, pp. 746-56, Jun 19 2015, doi: 10.1021/sb500345t
85	1,2-propanediol	0.15	N/A	N/A	Synechococcus elongatus PCC 7942	BG-11		50mL culture was grown in 250mL shake flasks under 100 μE/s/m2 light		LH22, harbors E. coli mgsA and yqhD E. coli and C. beijerinckii adh	H. Li and J. C. Liao, "Engineering a cyanobacterium as the catalyst for the photosynthetic conversion of CO2 to 1,2-propanediol," Microbial Cell Factories, vol. 12, 4, pp. 1-9, 2013.
86	1,3-propanediol	135	0.603	N/A	Synechococcus elongatus PCC 7942	BG-11		50mL culture was grown in 250mL shake flasks under 100 μE/s/m2 light		LH22, harbors E. coli mgsA and yqhD E. coli and C. beijerinckii adh	H. Li and J. C. Liao, "Engineering a cyanobacterium as the catalyst for the photosynthetic conversion of CO2 to 1,2-propanediol," Microbial Cell Factories, vol. 12, 4, pp. 1-9, 2013.
87	1,3-propanediol	129	0.34	N/A	Escherichia coli	(g/L): citric acid. HO (4.0), MnSOHO (3.0), NaCl (1.0), FeSO.7H2O (0.10), CoC1.6HO (0.10), ZnSO.7HO (0.10), CuSO4.5H2O (0.010), HBO (0.010), and NaMoC).2H2O (0.010).	Aerobic	Aerobic, 15 L stirred tank fermenter, 35 degC, pH 6.8, between 350 and 690 rpm aggitation	glucose	RJ8/pAH48/pKP32	M. Emptage, S. L. Haynie, L. A. Laffend, J. P. Pucci, and G. Whited, "Process for the biological production of 1,3-propanediol with high titer," United States Patent US 6,514,733 B1 Patent Appl. 09/641,652, 2003.
88	1,3-propanediol	0.0515	0.002	0.001g/L/h	E. coli	(g/L) 20 glucose, 1 KH2PO4, 1 MgSO4, 2 yeast extact, 0.01 FeSO4 · 7H2O, 0.01 MnSO4 · 7H2O, 1 threonine, 0.01 thiamin (VB1), and 30 CaCO3.		500 mL conical flasks containing 30 mL culture medium, 32 deg C, 250 rpm	glucose	MG1655ΔThrB (pZA-gdhAK92V/T195S-pdc-yqhD)	Z. Chen, F. Geng, and A. P. Zeng, "Protein design and engineering of a de novo pathway for microbial production of 1,3-propanediol from glucose," Biotechnol J, vol. 10, no. 2, pp. 284-9, Feb 2015, doi: 10.1002/biot.201400235.
89	1,4-butanediol	>125	>0.4	>3.5 g/L/h	E. coli	Genomatica, proprietary		Genomatica, proprietary	glucose	deltaadhE, deltapfl, deltaldh, deltamdh, add Klebseilla pneumonia lpdA D345K, gltA R163L	1. N. R. Barton et al., "An integrated biotechnology platform for developing sustainable chemical processes," J Ind Microbiol Biotechnol, vol. 42, no. 3, pp. 349-60, Mar 2015, doi: 10.1007/s10295-014-1541-1. 2. A. Burgard, M. J. Burk, R. Osterhout, S. Van Dien, and H. Yim, "Development of a commercial scale process for production of 1,4-butanediol from sugar," Curr Opin Biotechnol, vol. 42, pp. 1…
90	1,4-butanediol	20	N/A	N/A	E. coli	M9 minimal medium	micro-aerobic	Microaerobic, Twenty-milliliter bottle cultivations, 700 r.p.m., glucose concentration maintained between 0.5 and 5.0 g l−1.		ECKh-422	H. Yim et al., "Metabolic engineering of Escherichia coli for direct production of 1,4-butanediol," Nat Chem Biol, vol. 7, no. 7, pp. 445-52, May 22 2011, doi: 10.1038/nchembio.580.
91	2,3-butanediol	73.8	0.41	1.19 g/L/h	E. coli	M9 minimal medium		Weused500-mL flasks filled with100mLofmediumthat wasinoculatedwith1%(v/v), 37 degC, rotary shaker at 180 rpm	glucose	BL21/pET-RABC	Y. Xu et al., "Systematic metabolic engineering of Escherichia coli for high-yield production of fuel bio-chemical 2,3-butanediol," Metab Eng, vol. 23, pp. 22-33, May 2014, doi: 10.1016/j.ymben.2014.02.004
92	2,3-butanediol	103.7	0.487	2.95 g/L/h	Bacillus subtilis	LBR medium		Batch flas fermentation, 105 g/L glucose, 5‑L fermentor, 37 °C, 0.02 VVM aeration rates. Agitation speed 300 rpm, initial pH 6.5	glucose	BSF9	J. Fu et al., "Metabolic engineering of Bacillus subtilis for chiral pure meso-2,3-butanediol production," Biotechnol Biofuels, vol. 9, p. 90, 2016, doi: 10.1186/s13068-016-0502-5
93	2,3-butanediol	152	N/A	3.5 g/L/h	Enterobacter cloacae	(g/L)at pH 7.0: glucose, 60; cornsteep liquor powder (CSLP), 10; sodium acetate,4 ; KCl, 0.5;MgSO4 _ 7H2O, 0.15; FeSO4 _ 7H2O, 0.05; MnSO4 _ 7H2O, 0.03.	Anaerobic	100mL working volume, 500-mL Erlenmeyer flasks and incubated at 30 1C on a rotary shaker at 180rpm		SDM 09	L. Li et al., "Metabolic engineering of Enterobacter cloacae for high-yield production of enantiopure (2R,3R)-2,3-butanediol from lignocellulose-derived sugars," Metab Eng, vol. 28, pp. 19-27, Mar 2015, doi: 10.1016/j.ymben.2014.11.010
94	2,3-butanediol	152	N/A	2.76 g/L/h	Serratia marcescens	(g l-1): sucrose 90, yeast extract (Angel Yeast Co. Ltd, China) 33.36, sodium citrate 10, sodium acetate 4, NH4H2PO4 1, MgSO4 0.3, and MnSO4 0.1 at pH 7.2.		3.7-l bioreactor 1.8 l working volume. 30_C, 1.0 vvm aeration rate, 600 rpm first 15 h, After 15 h, the 0.5 vvm and 500 rpm, pH > 6.0		H30 swrW	L. Zhang et al., "Microbial production of 2,3-butanediol by a surfactant (serrawettin)-deficient mutant of Serratia marcescens H30," J Ind Microbiol Biotechnol, vol. 37, no. 8, pp. 857-62, Aug 2010, doi: 10.1007/s10295-010-0733-6
95	Isobutyraldehyde	35	0.4	8 g/L/day	Escherichia coli	M9 medium		15 mL screw-cap culture, 5mL working volume, 3 cc/min air flow rate, 37°C, 250 rpm, gas stripping apparatus for product recovery	glucose	AL626	G. M. Rodgriguez and S. Atsumi, "Isobutyraldehyde production from Escherichia coli by removing aldehyde reductase activity," Microbial Cell Factories, vol. 11, 90, pp. 1-11, 2012
96	Isobutyl acetate	17.2	0.334	2 g/L/day	E. coli	M9 medium		250-ml screw-cap flask, 30 °C on a rotary shaker (250 r.p.m.)	glucose		G. M. Rodriguez, Y. Tashiro, and S. Atsumi, "Expanding ester biosynthesis in Escherichia coli," Nat Chem Biol, vol. 10, no. 4, pp. 259-65, Apr 2014, doi: 10.1038/nchembio.1476
97	Ethyl butyrate	0.1416	N/A	N/A	E. coli	M9 hybrid medium supplemented with organic acids		(pH_7), 2 g/L organic acid and 0.5mM IPTG, and transferred into 15 mL glass centrifuge tubes with a working volume of 10mL. Each tube was overlaid with 1 mL hexadecane, , 37_C		EcDL105	D. S. Layton and C. T. Trinh, "Expanding the modular ester fermentative pathways for combinatorial biosynthesis of esters from volatile organic acids," Biotechnol Bioeng, vol. 113, no. 8, pp. 1764-76, Aug 2016, doi: 10.1002/bit.25947
98	Butyl butyrate	0.04763	N/A	N/A	E. coli	M9 hybrid medium supplemented with organic acids		(pH_7), 2 g/L organic acid and 0.5mM IPTG, and transferred into 15 mL glass centrifuge tubes with a working volume of 10mL. Each tube was overlaid with 1 mL hexadecane, , 37_C		EcDL104	D. S. Layton and C. T. Trinh, "Expanding the modular ester fermentative pathways for combinatorial biosynthesis of esters from volatile organic acids," Biotechnol Bioeng, vol. 113, no. 8, pp. 1764-76, Aug 2016, doi: 10.1002/bit.25948
99	Ethyl butyrate	0.08793	0.0153	1187.35724.32 μg/gDCW/h).	E. coli	M9 hybrid medium	Anaerobic	Anaerobic	glucose	EcDL204	D. S. Layton and C. T. Trinh, "Engineering modular ester fermentative pathways in Escherichia coli," Metab Eng, vol. 26, pp. 77-88, Nov 2014, doi: 10.1016/j.ymben.2014.09.006
100	isopropyl butyrate	0.0044	0.0018	68.9672.91 μg/gDCW/h).	E. coli	M9 hybrid medium	Anaerobic	Anaerobic	glucose	EcDL205	D. S. Layton and C. T. Trinh, "Engineering modular ester fermentative pathways in Escherichia coli," Metab Eng, vol. 26, pp. 77-88, Nov 2014, doi: 10.1016/j.ymben.2014.09.007
101	Isobutyl butyrate	0.0126	0.0029	or209.10718.58 μg/gDCW/h	E. coli	M9 hybrid medium	Anaerobic	Anaerobic	glucose	EcDL206	D. S. Layton and C. T. Trinh, "Engineering modular ester fermentative pathways in Escherichia coli," Metab Eng, vol. 26, pp. 77-88, Nov 2014, doi: 10.1016/j.ymben.2014.09.008
102	2,3-butanediol	54	0.49	0.45 g/L/h	E. coli	M9 medium supplemented with 5 g/L yeast extract		1% v/v inoculum, 30 1C with vigorous shaking.	hexose sugar	mlc- XT7-LAFC-YSDXL	N. Nakashima, H. Akita, and T. Hoshino, "Establishment of a novel gene expression method, BICES (biomass-inducible chromosome-based expression system), and its application to the production of 2,3-butanediol and acetoin," Metab Eng, vol. 25, pp. 204-14, Sep 2014, doi: 10.1016/j.ymben.2014.07.012
103	limonene	2.7	0.0041	0.0226 g/L/h	E. coli	M9 medium		3.1 L stirred tank reactors, 30°C, pH 7.2	Glycerol	BL21 (DE3) (pMVAidi, pTAC:LS:AGPPS2)	C. Willrodt, C. David, S. Cornelissen, B. Buhler, M. K. Julsing, and A. Schmid, "Engineering the productivity of recombinant Escherichia coli for limonene formation from glycerol in minimal media," Biotechnol J, vol. 9, no. 8, pp. 1000-12, Aug 2014, doi: 10.1002/biot.201400023
104	limonene	0.44	N/A	0.0061 g/L/h	E. coli	EZ-Rich defined medium		30 1C, rotary shakers at 200 rpm		1pA+P	J. Alonso-Gutierrez et al., "Metabolic engineering of Escherichia coli for limonene and perillyl alcohol production," Metab Eng, vol. 19, pp. 33-41, Sep 2013, doi: 10.1016/j.ymben.2013.05.004
105	Perillyl alcohol	0.11	N/A	0.0015 g/L/h	E. coli	EZ-Rich defined medium supplemented with 50 μM riboflavin		31 1C, rotary shakers at 200 rpm		1pA+P	J. Alonso-Gutierrez et al., "Metabolic engineering of Escherichia coli for limonene and perillyl alcohol production," Metab Eng, vol. 19, pp. 33-41, Sep 2013, doi: 10.1016/j.ymben.2013.05.005
106	myrcene	0.058	N/A	8.1e-4 g/L/h	E. coli	EZ-rich medium		Erlenmeyer flask (250 mL), 50 mL working volume, at 30 °C and 200 rpm		Ec-pM2/pM(Qi)	E. M. Kim, J. H. Eom, Y. Um, Y. Kim, and H. M. Woo, "Microbial Synthesis of Myrcene by Metabolically Engineered Escherichia coli," J Agric Food Chem, vol. 63, no. 18, pp. 4606-12, May 13 2015, doi: 10.1021/acs.jafc.5b01334
107	3-methyl-3-buten-1-ol	2.23	N/A	0.05 g/L/h	E.coli	EZ-Rich defined medium		50 mL of production media in a 250 mL Erlenmeyer flask rotary shakers (200 rpm) at 37 °C		KG1R10	K. W. George et al., "Metabolic engineering for the high-yield production of isoprenoid-based C5 alcohols in E. coli," Scientific Reports, vol. 5, no. 1, 2015, doi: 10.1038/srep11128
108	3-methyl-2-buten-1-ol	0.15	N/A	0.003 g/L/h	E. coli	EZ-Rich defined medium		51 mL of production media in a 250 mL Erlenmeyer flask rotary shakers (200 rpm) at 37 °C		KG8	K. W. George et al., "Metabolic engineering for the high-yield production of isoprenoid-based C5 alcohols in E. coli," Scientific Reports, vol. 5, no. 1, 2015, doi: 10.1038/srep11129
109	3-methyl-1-butanol	0.3	N/A	0.006 g/L/h	E. coli	EZ-Rich defined medium		52 mL of production media in a 250 mL Erlenmeyer flask rotary shakers (200 rpm) at 37 °C		KG9	K. W. George et al., "Metabolic engineering for the high-yield production of isoprenoid-based C5 alcohols in E. coli," Scientific Reports, vol. 5, no. 1, 2015, doi: 10.1038/srep11130
110	2-methyl-1-butanol	1.25	0.17	0.05 g/L/h	E. coli	modified M9 medium (6 g Na2HPO4, 3 g KH2PO4, 1 g NH4Cl, 0.5 g NaCl, 1 mM MgSO4, 1 mM CaCl2, 10 mg vitamin B1 per liter of water) containing 15 g/L of glucose, 5 g/L of yeast extract, and 1,000Å~ Trace Metals Mix A5 (2.86 g H3BO3, 1.81 g MnCl2·4H2O, 0.222 g ZnSO4·7H2O, 0.39 g Na2MoO4·2H2O, 79 mg CuSO4·5H2O, 49.4 mg Co (NO3)2·6H2O per liter of water).		125 mL screw-cap flasks 30°C.	glucose	CRS22 (ΔmetA Δtdh)	A. F. Cann and J. C. Liao, "Production of 2-methyl-1-butanol in engineered Escherichia coli," Appl Microbiol Biotechnol, vol. 81, no. 1, pp. 89-98, Nov 2008, doi: 10.1007/s00253-008-1631-y
111	2-methyl-1-butanol	0.2	N/A	6.9e-4 g/L/h	Synechococcus elongatus PCC7942	BG-11		150 mEs1m2 light conditions at 30 °C.		CR-73	C. R. Shen and J. C. Liao, "Photosynthetic production of 2-methyl-1-butanol from CO2 in cyanobacterium Synechococcus elongatus PCC7942 and characterization of the native acetohydroxyacid synthase," Energy & Environmental Science, vol. 5, no. 11, 2012, doi: 10.1039/c2ee23148d.
112	isobutyl acetate	36	0.06	0.5 g/L/h	E. coli	per liter: glucose, 10 g; K2HPO4, 7.5 g; MgSO4*7H2O, 2 g; citric acid monohydrate, 2 g; ferric ammonium citrate, 0.3 g; yeast extract, 20 g; 98% sulfuric acid, 0.8 ml; ampicillin, 0.1 g; kanamycin, 0.05 g; 1000X Modified Trace Metal Solution, 1 ml; and Vitamin Solution, 1ml.		Fermentations were performed in 1.3-L bench-top bioreactor(New Brunswick Bio flos 115)with a working volume of 0.5L, 30 degC	glucose	IBA3	Y. S. Tai, M. Xiong, and K. Zhang, "Engineered biosynthesis of medium-chain esters in Escherichia coli," Metab Eng, vol. 27, pp. 20-28, Jan 2015, doi: 10.1016/j.ymben.2014.10.004
113	benzaldehyde	5	N/A	0.097 g/L/h	Pichia pastoris			5 L BioFlo III bioreactor (New Brunswick Scientific, Edison, NJ) containing 3 L of medium with 10 g L _1 glycerol and 10 g L _1 methanol and operated at 500 rpm, 4 L min _1 aeration and pH 5.5.		ATCC 28485	T. Craig and A. J. Daugulis, "Polymer characterization and optimization of conditions for the enhanced bioproduction of benzaldehyde by Pichia pastoris in a two-phase partitioning bioreactor," Biotechnol Bioeng, vol. 110, no. 4, pp. 1098-105, Apr 2013, doi: 10.1002/bit.24778
114	bisabolene	0.99	N/A	0.01 g/L/h	S. cerevisiae	5 ml of YEP supplemented with 1.8 % galactose / 0.2 % glucose and overlayed with 10 % dodecane.		N/A		AgBIS	P. P. Peralta-Yahya, M. Ouellet, R. Chan, A. Mukhopadhyay, J. D. Keasling, and T. S. Lee, "Identification and microbial production of a terpene-based advanced biofuel," Nat Commun, vol. 2, p. 483, Sep 27 2011, doi: 10.1038/ncomms1494
115	Isobutyl acetate	19.7	0.39	0.16 g/L/h	E. coli	M9P medium		250-ml screw-cap flask, 20 ml cell culture, 20 ml of n-hexadecane, 30 _C, 250 r.p.m.	glucose	JCL260, PLlacO1: ackA–pta	Y. Tashiro, S. H. Desai, and S. Atsumi, "Two-dimensional isobutyl acetate production pathways to improve carbon yield," Nat Commun, vol. 6, p. 7488, Jun 25 2015, doi: 10.1038/ncomms8488
116	Isopentenol	1.08	0.108	0.023	E. coli	EZ-Rich defined medium		Shake flask, 30 °C 200 rpm	glucose	ARK1b	A. Kang, K. W. George, G. Wang, E. Baidoo, J. D. Keasling, and T. S. Lee, "Isopentenyl diphosphate (IPP)-bypass mevalonate pathways for isopentenol production," Metab Eng, vol. 34, pp. 25-35, Mar 2016, doi: 10.1016/j.ymben.2015.12.002
117	Pyruvate	44.03	0.47	0.44 g/L/h	Corynebacterium glutamicum	CGXII minimal medium		400 ml bioreactors, 300 ml initial working volume, 30°C, pH 7, stirring at 400 to 1,040 rpm	glucose	△aceE △pqo △ldhA △C–T ilvN △alaT △avtA	S. Wieschalka, B. Blombach, and B. J. Eikmanns, "Engineering Corynebacterium glutamicum for the production of pyruvate," Appl Microbiol Biotechnol, vol. 94, no. 2, pp. 449-59, Apr 2012, doi: 10.1007/s00253-011-3843-9
118	Pyruvate	79 g/L	N/A	6.04 g/L/h	E. coli	N/A		N/A		YYC202 ldhA::Kan	B. Zelic, S. Gostovic, K. Vuorilehto, D. Vasic-Racki, and R. Takors, "Process strategies to enhance pyruvate production with recombinant Escherichia coli: from repetitive fed-batch to in situ product recovery with fully integrated electrodialysis," Biotechnol Bioeng, vol. 85, no. 6, pp. 638-46, Mar 20 2004, doi: 10.1002/bit.10820
119	Succinic acid	146.3	0.92	3.2 g/L/h	Corynebacterium glutamicum	BT medium,		Anaerobic, 33°C in a lidded bottle.	glucose	ΔldhApCRA717	S. Okino, R. Noburyu, M. Suda, T. Jojima, M. Inui, and H. Yukawa, "An efficient succinic acid production process in a metabolically engineered Corynebacterium glutamicum strain," Appl Microbiol Biotechnol, vol. 81, no. 3, pp. 459-64, Dec 2008, doi: 10.1007/s00253-008-1668-y
120	succinate	134	1.1	2.53 g/L/h	Corynebacterium glutamicum	CGXII medium		Two stages—aerobic growth in minimal medium, anaerobic fed-batch production in saline solution	glucose	BOL-3/pAN6-gap	B. Litsanov, M. Brocker, and M. Bott, "Toward homosuccinate fermentation: metabolic engineering of Corynebacterium glutamicum for anaerobic production of succinate from glucose and formate," Appl Environ Microbiol, vol. 78, no. 9, pp. 3325-37, May 2012, doi: 10.1128/AEM.07790-11
121	succinate	82.7	0.92	0.88 g/L/h	E. coli	AM1 mineral salt medium		Anaerobic, working volume of 350 mL	glucose	KJ122	K. Jantama, X. Zhang, J. C. Moore, K. T. Shanmugam, S. A. Svoronos, and L. O. Ingram, "Eliminating side products and increasing succinate yields in engineered strains of Escherichia coli C," Biotechnol Bioeng, vol. 101, no. 5, pp. 881-93, Dec 1 2008, doi: 10.1002/bit.22005
122	Hexanoic acid	0.154	0.008	0.0032 g/L/h	Kluyveromyces marxianus	YP medium		Microaerobic, 50 mL YP medium, 20 g/L galactose, 125 mL flask, 37◦C	galactose	H4A	Y. Cheon et al., "A biosynthetic pathway for hexanoic acid production in Kluyveromyces marxianus," J Biotechnol, vol. 182-183, pp. 30-6, Jul 20 2014, doi: 10.1016/j.jbiotec.2014.04.010
123	Isohexanol	0.192	0.028	0.003 g/L/h	E. coli	LB medium		3ml cultures in 1 inch diameter 50 ml screw-cap culture tubes, 30 _C, 1.2% glucose	glucose	M1Fj(IA)2I34	M. J. Sheppard, A. M. Kunjapur, S. J. Wenck, and K. L. Prather, "Retro-biosynthetic screening of a modular pathway design achieves selective route for microbial synthesis of 4-methyl-pentanol," Nat Commun, vol. 5, p. 5031, Sep 24 2014, doi: 10.1038/ncomms6031
124	Medium-chain fatty acids	0.263	0.08	0.006 g/L/h	E. coli	M9 medium + 0.5% glucose		30 °C either in shake flasks or 96-well plates, induced with 1 mM isopropyl-β-D-thiogalactopyranoside		pTJF038	J. P. Torella, T. J. Ford, S. N. Kim, A. M. Chen, J. C. Way, and P. A. Silver, "Tailored fatty acid synthesis via dynamic control of fatty acid elongation," Proc Natl Acad Sci U S A, vol. 110, no. 28, pp. 11290-5, Jul 9 2013, doi: 10.1073/pnas.1307129110
125	Medium-chain primary alcohols	0.3 g/L	0.015	0.006 g/L/h	E. coli	MOPS medium		25-mL Pyrex Erlenmeyer flasks , 37 °C and 200 rpm, induced with 1 mM isopropyl-β-D-thiogalactopyranoside	Glycerol	JST07 (DE3) bktBCT5 fadBCT5 ΔfadA egTERCT5	S. Kim, J. M. Clomburg, and R. Gonzalez, "Synthesis of medium-chain length (C6-C10) fuels and chemicals via beta-oxidation reversal in Escherichia coli," J Ind Microbiol Biotechnol, vol. 42, no. 3, pp. 465-75, Mar 2015, doi: 10.1007/s10295-015-1589-6
126	Isopropanol, butanol, and ethanol	35.6	0.27	0.79 g/L/h	Clostridium acetobutylicum	Clostridia growth medium		Fed-batch 7-liter bioreactor containing 1.8 liters CGM, 2 L working volume, 200 rpm and a pH 5.8, gas stripping after 12 h	glucose	PJC4BK(pIPA3-Cm2)	J. Lee et al., "Metabolic engineering of Clostridium acetobutylicum ATCC 824 for isopropanol-butanol-ethanol fermentation," Appl Environ Microbiol, vol. 78, no. 5, pp. 1416-23, Mar 2012, doi: 10.1128/AEM.06382-11
127	Isopropanol, butanol, and ethanol	21	0.34	0.8 g/L/h	Clostridium acetobutylicum	CGM medium supplemented with		A 2 l Biostat B bioreactor, was used with a working volume of 1.5 l, 300rpm, 35 1C, pH 4.8, 80 g/L glucose,	glucose	824 Δbuk pCLF952	S. Dusseaux, C. Croux, P. Soucaille, and I. Meynial-Salles, "Metabolic engineering of Clostridium acetobutylicum ATCC 824 for the high-yield production of a biofuel composed of an isopropanol/butanol/ethanol mixture," Metab Eng, vol. 18, pp. 1-8, Jul 2013, doi: 10.1016/j.ymben.2013.03.003
128	Isopropanol, butanol, and ethanol	23.8	0.31	0.5 g/L/h	C. acetobutylicum	CGM medium		3.0 L (working volume) of CGM with 10% inoculum size	glucose	Rh8(psADH)	Z. Dai, H. Dong, Y. Zhu, Y. Zhang, Y. Li, and Y. Ma, "Introducing a single secondary alcohol dehydrogenase into butanol-tolerant Clostridium acetobuutylicum Rh8 switches ABE fermentation to high level IBE fermentation," Biotechnology for Biofuels, vol. 5, 44, pp. 1-10, 2012
129	Isopropanol, butanol, and ethanol	32.5	0.38	0.42 g/L/h	C. acetobutylicum	CGM medium		32_C in a 5 l jar fermenter containing 1.8 l of CGM supplemented with 100 g/l glucose. 200 rpm,	glucose	BKM19 (pIPA100)	Y. S. Jang et al., "Metabolic engineering of Clostridium acetobutylicum for the enhanced production of isopropanol-butanol-ethanol fuel mixture," Biotechnol Prog, vol. 29, no. 4, pp. 1083-8, Jul-Aug 2013, doi: 10.1002/btpr.1733
130	Medium-chain fatty acids	1.6	0.13	0.013 g/L/h	E. coli	MOPS medium	Anaerobic	Anaerobic Fed batch, 3L stir tank bioreactor, 1L working volume, 30 degC, pH 7, agitation between 240 and 320 rpm, 0.7% glucose, induced with 1mM IPTG	glucose	TY34 pBTRK-MAACR	J. T. Youngquist et al., "Production of medium chain length fatty alcohols from glucose in Escherichia coli," Metab Eng, vol. 20, pp. 177-86, Nov 2013, doi: 10.1016/j.ymben.2013.10.006
131
132
133	butanoic acid	12.25	N/A	N/A	Clostridium butyricum ZJUCB	fermentation medium was composed of 20 g glucose, 3.7 g corn steep flour, 1 g (NH4)2SO4, 1.24 g NaHCO3, 0.2 g MnSO4·H2O, 0.2 g MgSO4·7H2O, 0.02 g CaCl2 per liter at pH 7.5. The medium was autoclaved at 121 °C for 20 min, and cooled to room temperature prior to use	Anaerobic	Batch-fermentation, pH 6~7, 37°C, Oxygen-free nitrogen gas passed through the culture fluid at a rate of 0.3~0.4 L per minute	glucose		G. Q. He, Q. Kong, Q. H. Chen, and H. Ruan, “Batch and fed-batch production of butyric acid by Clostridium butyricum ZJUCB,” J. Zhejiang Univ. Sci., vol. 6 B, no. 11, pp. 1076–1080, Nov. 2005
134	butanoic acid	16.74	N/A	N/A	Clostridium butyricum ZJUCB	fermentation medium was composed of 20 g glucose, 3.7 g corn steep flour, 1 g (NH4)2SO4, 1.24 g NaHCO3, 0.2 g MnSO4·H2O, 0.2 g MgSO4·7H2O, 0.02 g CaCl2 per liter at pH 7.5. The medium was autoclaved at 121 °C for 20 min, and cooled to room temperature prior to use	Anaerobic	Fed-batch fermentation, pH 6~7, 37°C, Oxygen-free nitrogen gas passed through the culture fluid at a rate of 0.3~0.4 L per minute, and adding concentrated glucose feed (glucose concentration=200 g/L) at a constant feed rate of 0.025 L/h, stopped after 32h	glucose		G. Q. He, Q. Kong, Q. H. Chen, and H. Ruan, “Batch and fed-batch production of butyric acid by Clostridium butyricum ZJUCB,” J. Zhejiang Univ. Sci., vol. 6 B, no. 11, pp. 1076–1080, Nov. 2006
135	butanoic acid	43	0.47		Clostridium tyrobutyricum	CGM	Anaerobic	Fed-batch fermentation in 5-L stirred-tank fermentors, Anaerobiosis by sparging the medium with nitrogen (10 mL/min) for 30 min, pH ∼6.0 with 6N HCl before inoculation with ∼100 mL of cell suspension prepared in a serum bottle, carried out at 37◦C, 150 rpm and pH6.0±0.1 controlled by adding 5N NaOH solution	glucose	PAK-Em	X. Liu, Y. Zhu, and S. T. Yang, “Butyric acid and hydrogen production by Clostridium tyrobutyricum ATCC 25755 and mutants,” Enzyme Microb. Technol., vol. 38, no. 3–4, pp. 521–528, Feb. 2006.
136	butanoic acid	62.8	0.45	1.25	Clostridium tyrobutyricum	The fermentation broth contained the following supplementations: yeast extract (Biom6rieux, France), 5 g 1- 1 (except mentioned otherwise); FeSO 4 9 7 H20 , 30 mg l-l; KH2PO4 ' 1.5g 1-1; MgSO4"7 H20 , 0.6g 1-1; (NH4)2804, 1 g 1- 1. Media were sterilized at 110 ~ for 40 rain.	Anaerobic	Fed-batch fermentation: 6-liter fermentor (Biolafitte, France) equipped with pH regulation connected to volumetric gas meter (1 din3), FLONIC, Montrouge, France). Preculture in an anaerobic chamber at 34 ~ for 18 h on 200 ml of culture medium containing 30 g 1-1 of glucose operated under low stirring (300 rpm) and pH 6.5 by addition of 5 N NH4OH	glucose		F. Fayolle, R. Marchal, and D. Ballerini, “Effect of controlled substrate feeding on butyric acid production by Clostridium tyrobutyricum,” J. Ind. Microbiol., vol. 6, no. 3, pp. 179–183, Nov. 1990.
137	butanoic acid	N/A	0.33	N/A	Clostridium tyrobutyricum	Reinforced Clostridial Medium (RCM)	Anaerobic	anaerobic reactor agitated at 150 rpm with initial glucose concentration 111.2 mM, at 37°C, and pH maintained by automatic titration with 5N NaOH and 5N HCl solutions	glucose		J. H. Jo, D. S. Lee, and J. M. Park, “The effects of pH on carbon material and energy balances in hydrogen-producing Clostridium tyrobutyricum JM1,” Bioresour. Technol., vol. 99, no. 17, pp. 8485–8491, Nov. 2008.
138	butanoic acid	32.5	0.39	0.89	Clostridium acetobutylicum	clostridial growth medium (CGM) which contained per liter: 0.75 g K2HPO4, 0.75 g KH2PO4, 0.7 gMgSO.7H2O, 0.017 g MnSO.5H2O, 0.01 g FeSO4.7H2O, 2 g(NH4)2SO4, 1 g NaCl, 2 g asparagine, 0.004 gp-aminobenzoic acid,5 g yeast extract and 80 g glucose	Anaerobic	cultured in anaerobic chamber (Forma Scientific, Marietta, OH) filled with 96% nitrogen and 4% hydrogen at 371C.	glucose	pta, buk, ctfB and adhE1 (C. acetobutylicum HCBEK)	Y. S. Jang, J. A. Im, S. Y. Choi, J. I. Lee, and S. Y. Lee, “Metabolic engineering of Clostridium acetobutylicum for butyric acid production with high butyric acid selectivity,” Metab. Eng., vol. 23, pp. 165–174, 2014
139	butanoic acid	9.47	0.48	N/A	Clostridium tyrobutyricum	MRS	Anaerobic	RPT-4213 grown on MRS (Becton Dickinson,Sparks, MD) agar plates under anaerobic conditions at 37°C, a single colony was inoculated in 3 mL MRS broth and grown 24–48 h in an anaerobic jar at 37°C. Active cultures were maintained by transferring (0.1% inocula) to fresh MRS medium on a weekly basis	glucose	strain RPT-421	S. Liu, K. M. Bischoff, T. D. Leathers, N. Qureshi, J. O. Rich, and S. R. Hughes, “Butyric acid from anaerobic fermentation of lignocellulosic biomass hydrolysates by Clostridium tyrobutyricum strain RPT-4213,” Bioresour. Technol., vol. 143, pp. 322–329, 2013
140	Pinene	0.032	N/A	N/A	E. coli	EZ-rich medium			glucose	E. coli MG1655 co-transformed with pBbA5c-MevT-MB	S. Sarria, B. Wong, H. G. Martín, J. D. Keasling, and P. Peralta-Yahya, “Microbial synthesis of pinene,” ACS Synth. Biol., vol. 3, no. 7, pp. 466–475, Jul. 2014.
141	alpha-pinine	0.97	0.0261	N/A	E. coli	LB medium		Fed-batch fermentation conditions with medium containing glucose 20 g/L, K2HPO49.8 g/L, beefextract 5 g/L, ferric ammonium citrate 0.3 g/L, citric acidmonohydrate 2.1 g/L, MgSO40.06 g/L and 1 ml traceelement solution, which included (NH4)6Mo7O24·4H2O0.37 g/L, ZnSO4·7H2O0.29g/L,H3BO42.47 g/L, CuSO4·5H2O0.25g/L,andMnCl2·4H2O 1.58 g/L	glucose	Strain YJM28: E.coliBL21(DE3)/pYJM27,pYJM14	J. Yang et al., “Metabolic engineering of Escherichia coli for the biosynthesis of alpha-pinene,” Biotechnol. Biofuels, vol. 6, no. 1, 2013
142	Propionic acid	19.5	0.51	0.103	Propionibacterium freudenreichii	LB medium	Anaerobic	grown anaerobically in sodium lactate broth (NLB) containing 10 g/L sodium lactate, 10 g/L yeast extract, and 10 g/L trypticasesoy broth at 32 °C	glucose	Pf(ppc)	E. M. Ammar, Y. Jin, Z. Wang, and S. T. Yang, “Metabolic engineering of Propionibacterium freudenreichii: Effect of expressing phosphoenolpyruvate carboxylase on propionic acid production,” Appl. Microbiol. Biotechnol., vol. 98, no. 18, pp. 7761–7772, Sep. 2014.
143	Propionic acid	13.2	0.78	0.064	Propionibacterium freudenreichii	LB medium	Anaerobic	grown anaerobically in sodium lactate broth (NLB) containing 10 g/L sodium lactate, 10 g/L yeast extract, and 10 g/L trypticasesoy broth at 32 °C	Glycerol	Pf(ppc)	E. M. Ammar, Y. Jin, Z. Wang, and S. T. Yang, “Metabolic engineering of Propionibacterium freudenreichii: Effect of expressing phosphoenolpyruvate carboxylase on propionic acid production,” Appl. Microbiol. Biotechnol., vol. 98, no. 18, pp. 7761–7772, Sep. 2014.
144	Propionic acid	106	0.56	N/A	Propionibacterium acidiproionici	synthetic medium containing (in 1 L) 10 g yeast extract (Difco Laboratories, Detroit, MI), 5 g trypticase (BBL), 0.25 g K2HPO4, 0.05 gMnSO4, and 20–40 g glycerol or glucose as the carbon source	Anaerobic	Free-cell fermentations in a 5-L fermentor (Marubishi MD-300) containing 2L medium at 328C and pH 7.0, controlled by automatically adding 6N NaOH	Glycerol	ACK-Tet	A. Zhang and S. T. Yang, “Propionic acid production from glycerol by metabolically engineered Propionibacterium acidipropionici,” Process Biochem., vol. 44, no. 12, pp. 1346–1351, Dec. 2009.
145	Propionic acid	0.274	N/A	N/A	E. coli	LB medium	Aerobic followed by Anaerobic	batch cultivation in LB medium a 10 % (v/v) inoculum was used, pH 7.0 by addition of 3 M NaOH, temperature and agitation at 37 °C and 600 rpm	glucose	ldhA-pflA/pflB-adhE/ackA-fnr	V. Kandasamy et al., “Engineering Escherichia coli with acrylate pathway genes for propionic acid synthesis and its impact on mixed-acid fermentation,” Appl. Microbiol. Biotechnol., vol. 97, no. 3, pp. 1191–1200, Feb. 2013
146	Propionic acid	N/A	0.6	2.12	Propionibacterium acidiproionici		Anaerobic	Fibrous bed-bioreactor for fermentation at 32°C, pH 6.0	Hydrolyzate		Y. L. Huang, Z. Wu, L. Zhang, C. Ming Cheung, and S. T. Yang, “Production of carboxylic acids from hydrolyzed corn meal by immobilized cell fermentation in a fibrous-bed bioreactor,” Bioresour. Technol., vol. 82, no. 1, pp. 51–59, 2002
147	butanoic acid	N/A	0.5	6.78	Clostridium tyrobutyricum		Anaerobic	Fibrous bed-bioreactor for fermentation at 37°C, pH 6.0	Hydrolyzate		Y. L. Huang, Z. Wu, L. Zhang, C. Ming Cheung, and S. T. Yang, “Production of carboxylic acids from hydrolyzed corn meal by immobilized cell fermentation in a fibrous-bed bioreactor,” Bioresour. Technol., vol. 82, no. 1, pp. 51–59, 2003
148	Propionic acid	29.2	0.544	0.152	Propionibacterium acidiproionici	basic medium containing glucose,glycerol, or mixed substrates. The seed medium was TY medium (pH 7.0) including 0.5% tryptic soy broth, 1%yeast extract, 0.25% K2HPO4, and 0.15% KH2PO4.	Anaerobic	fermentation in a 5-l glass bioreactor (Biostat B plus,B. Braun, Germany) containing 2 l production medium with anaerobic conditions, inoculum of 5%(v/v) at temperature 30°C, pH 6.5, and agitation speed 150 rpm	glucose + glycerol(4:1)	CGMCC1.2225 (ATCC4965)	Y. Liu, Y. G. Zhang, R. B. Zhang, F. Zhang, and J. Zhu, “Glycerol/glucose co-fermentation: One more proficient process to produce propionic acid by Propionibacterium acidipropionici,” Curr. Microbiol., vol. 62, no. 1, pp. 152–158, Jan. 2011
149	Ethanol	N/A	N/A	0.1357	Saccharomyces cerevisiae	minimal medium	Anaerobic	Anaerobic batch cultivations at 30°C and stirring rate of 600 rpm in in-house-manufactured bioreactors. The working volume of batch reactors, 4.5 liters. pH constant at 5.0	glucose	strain TN19 (gdh}-2}PGK}p-GLT}PGK}p-GLN})	T. L. Nissen, M. C. Kielland-Brandt, J. Nielsen, and J. Villadsen, “Optimization of ethanol production in Saccharomyces cerevisiae by metabolic engineering of the ammonium assimilation,” Metab. Eng., vol. 2, no. 1, pp. 69–77, 2000
150	Ethanol	74.5	N/A	N/A	Saccharomyces cerevisiae	LB medium	Anaerobic	Cultivations at30°C with a stirring at 300 rpm and were flushed with N2 gas at a flow rate of 400 ml min-1. pH at 5 by automatic addition of 4 M KOH	glucose	MHS1 (PTPI–mhpF)	L. Zhang, Y. Tang, Z. peng Guo, Z. yang Ding, and G. yang Shi, “Improving the ethanol yield by reducing glycerol formation using cofactor regulation in Saccharomyces cerevisiae,” Biotechnol. Lett., vol. 33, no. 7, pp. 1375–1380, Jul. 2011
151	Ethanol	N/A	0.465	N/A	Saccharomyces cerevisiae	synthetic medium	Anaerobic	Anaerobic batch fermentations were carried out at 30°C in 2-liter laboratoryfermentors (Applikon, Schiedam, the Netherlands) with a working volume of 1liter.	glucose	IMZ132 (gpd1, gpd, mhpF)	V. G. Medina, M. J. H. Almering, A. J. A. Van Maris, and J. T. Pronk, “Elimination of glycerol production in anaerobic cultures of a saccharomyces cerevisiae strain engineered to use acetic acid as an electron acceptor,” Appl. Environ. Microbiol., vol. 76, no. 1, pp. 190–195, Jan. 2010
152	Lactic acid	135	0.93	3.5	Lactobacillus delbrueckii	MRS liquid medium	Anaerobic	Fermentation in 250 ml screw cap conical flasks containing 100 ml of fermentation medium. Flasks were inoculated with 5% inoculum culture and incubated in shaker incubator at 428C with shaking at150 rpm.	cane sugar	Uc-3 mutant	S. R. Kadam, S. S. Patil, K. B. Bastawde, J. M. Khire, and D. V. Gokhale, “Strain improvement of Lactobacillus delbrueckii NCIM 2365 for lactic acid production,” Process Biochem., vol. 41, no. 1, pp. 120–126, Jan. 2006
153	Lactic acid	122	0.61	N/A	Saccharomyces cerevisiae	YPD medium (1% bactoyeast extract, 2% bacto peptone, and 2% glucose, wt/vol)	Aerobic	fermentation at 30°C in 100 mL flask with a working volume of 40 mL in YPD10 medium containing 3% of sterilized cal-cium carbonate (wt/vol). The culture for 24 h at 30°C on a shaker, followed by transfer to the fermentation medium at an inoculum size of 0.1% packed cell volume(PCV). Cells were inoculated into a 1-L jar-fermenter made by BiottoCorporation (Tokyo, Japan). The jar conditions : 32°C …	cane juice	T165R	N. Ishida et al., “Metabolic engineering of Saccharomyces cerevisiae for efficient production of pure L-(+)-lactic acid,” in Applied Biochemistry and Biotechnology, 2006, vol. 131, no. 1–3, pp. 795–807
154	Lactic acid	97	0.9	3.17	E. coli	NBS mineral salt medium	Aerobic	7 L fermentors containing 5L NBS medium with 100 g/L sucrose	sucrose	WYZ-L	Y. Wang et al., “Engineering and adaptive evolution of Escherichia coli W for l-lactic acid fermentation from molasses and corn steep liquor without additional nutrients,” Bioresour. Technol., vol. 148, pp. 394–400, 2013.
155	Lactic acid	92	0.94	3.3	Candida sonorensis	minimal medium	N/A	biomass was grown in yeast nitrogen base medium (YNB w/o amino acids;Difco, Sparks, MD) supplemented with 5% glucose and buffered to pH 5.5 with 0.5 M 2-[N-Morpholino]ethanesulfonic acid (MES). Overnight cultivation at 30°C and 250 rpm, cells harvested by centrifugation and transferred into YNB medium supplemented with 10% (w/v) glucose, to give an initial cell density of OD600~ 15 corresponding …	glucose	pdc1Δ::LhLDH	M. Ilmén, K. Koivuranta, L. Ruohonen, V. Rajgarhia, P. Suominen, and M. Penttilä, “Production of l-lactic acid by the yeast Candida sonorensis expressing heterologous bacterial and fungal lactate dehydrogenases,” Microb. Cell Fact., vol. 12, no. 1, May 2013
156	Lactic acid	1.216 mol/l	0.93		E. coli	mineral salt medium	Anaerobic	NBS medium, pH 7.5, 12% glucose+betaine	glucose	SZ194	S. Zhou, K. T. Shanmugam, L. P. Yomano, T. B. Grabar, and L. O. Ingram, “Fermentation of 12% (w/v) glucose to 1.2 M lactate by Escherichia coli strain SZ194 using mineral salts medium,” Biotechnol. Lett., vol. 28, no. 9, pp. 663–670, May 2006
157	Acetate	878mM	0.5025	N/A	E. coli	LB medium	Aerobic	Fed batch 5% DO	glucose	Strain TC36: W3110, (Succ, Δ(focA-pflB)::FRT ΔfrdBC ΔldhA Δatp(FH):: ΔFRT ΔadhE::FRT ΔsucA::FRT	T. B. Causey, S. Zhou, K. T. Shanmugam, and L. O. Ingram, “Engineering the metabolism of Escherichia coli W3110 for the conversion of sugar to redox-neutral and oxidized products: Homoacetate production,” Proc. Natl. Acad. Sci. U. S. A., vol. 100, no. 3, pp. 825–832, Feb. 2003.
158	Pyruvate	52	0.76	1.21	E. coli	mineral salt medium	Aerobic		glucose	pflB frdBC ldhA atpFH adhE sucA ackA poxB	T. B. Causey, K. T. Shanmugam, L. P. Yomano, and L. O. Ingram, “Engineering Escherichia coli for efficient conversion of glucose to pyruvate,” Proc. Natl. Acad. Sci. U. S. A., vol. 101, no. 8, pp. 2235–2240, Feb. 2004
159	Glutarate	1.7	N/A	N/A	E. coli	MR medium containing 20 g/L of glucose and10 g/L ofL-lysine	N/A	Fed-batch cultures at 30°C in a 5L jar fermentor (Satorius, Bohemia, NY, USA) containing 1.5L of MR medium supplemented with 3 g/L of (NH4)2SO4 and 10 g/L ofglucose	glucose	KE112-DavABGabTD : pKE112-MCS derivative;P. putida davAB, P. putida gabTD;Ap	S. J. Park et al., “Metabolic engineering of Escherichia coli for the production of 5-aminovalerate and glutarate as C5 platform chemicals,” Metab. Eng., vol. 16, no. 1, pp. 42–47, 2013
160	1,3-propanediol	104.4	0.902	2.61	E. coli	YT medium	Step1 Aerobic + step 2 Anaerobic		Glycerol	dhaB1,dhaB2, andyqhD	X. Tang, Y. Tan, H. Zhu, K. Zhao, and W. Shen, “Microbial conversion of glycerol to 1,3-propanediol by an engineered strain of escherichia coli,” Appl. Environ. Microbiol., vol. 75, no. 6, pp. 1628–1634, Mar. 2009
161	Isoamyl acetate	1.11mM			E. coli	LB	Aerobic	20g/l glucose	glucose	YBS121(pRV380, pKmAT)	R. V. Vadali, G. N. Bennett, and K. Y. San, “Applicability of CoA/acetyl-CoA manipulation system to enhance isoamyl acetate production in Escherichia coli,” Metab. Eng., vol. 6, no. 4, pp. 294–299, Oct. 2004.
162	Itaconic acid	4.6	0.058	0.045	Yarrowia lipolytica	media contained 80 g/L glucose and 6.7 g/L YeastNitrogen Base w/ (NH4)2SO4andw/oaminoacids	Aerobic	Bioreactor fermentations as batch processes- Seed cultures grown in 50mL of YSC-URA,-LEU for three days and used to inoculate the bioreactors at an initial OD600=0.1 in 1.5 L of media. Oxygen supplied using a constant air inputflow rate of 2.5 v/(v*min)(3.75 L/min) and the dissolved oxygen concentration maintained at 50% of saturation by varying the impeller agitation speed between 250 rpm and 80…	glucose	416-UASTEF-UASCIT-UASCLB-PGPD	J. Blazeck, A. Hill, M. Jamoussi, A. Pan, J. Miller, and H. S. Alper, “Metabolic engineering of Yarrowia lipolytica for itaconic acid production,” Metab. Eng., vol. 32, pp. 66–73, Nov. 2015.
163	Itaconic acid	4.34			E. coli	LB	Aerobic		glucose	SO11	S. Okamoto et al., “Production of itaconic acid using metabolically engineered escherichia coli shusuke okamoto1,” J. Gen. Appl. Microbiol., vol. 60, no. 5, pp. 191–197, 2014
164	Itaconic acid	32	0.68	0.45	E. coli	minimal medium	Aerobic	bioreactor cultivations of ita23: MM modified by increasing the MgSO4.7H2O concentration to 0.5 g/l and glutamic acid concentration to 6 g/l, pH controlled by addition of 1 M NaOH (first 29 h) or 2 M NaOH-solution.The fed-batch cultivations were carried out in 1 L Multiforsbioreactors (Infors) and a glucose starting concentration of 27 g/l. The medium for the manual feed pulses contained 300 g/l …	glucose	ita23: MG1655ΔaceAΔsucCDΔpykAΔpykFΔptaΔPicd::cam_BBa_J23115pCadCS	B. J. Harder, K. Bettenbrock, and S. Klamt, “Model-based metabolic engineering enables high yield itaconic acid production by Escherichia coli,” Metab. Eng., vol. 38, pp. 29–37, Nov. 2016
165	butyl butyrate, isobutyl butyrate	0.063	N/A	N/A	Engineered strain(cDL208)	Medium (pH~7) contained 100 mL/L of 10X M9 salts, 1 mL/L of 1 MMgSO4,100μL/L of 1 M CaCl2, 1 mL/L of stock thiamine solution (1 g/L), 1 mL/L of stock trace metals solution,5 g/L yeast extract, 2 g/L organic acid (e.g., acetic, propionic, butyric, pentanoic, or hexanoic acid), 20 g/L glucose, 25μg/mL kanamycin, and 50μg/mL ampicillin. The stock 10x M9 salt solution contained 67.8 g/L Na2HPO4, 30 g…	Anaerobic	24 hr in situ fermentation	glucose	pDL014- pETite* PT7:RBS:pct:RBS:atf1:TT7; ampR pDL015- pETite* PT7:RBS:pct:RBS:SAAT:TT7;ampR pDL016- pETite* PT7:RBS:pct:RBS:VAAT:TT7;ampR	D. S. Layton and C. T. Trinh, “Microbial synthesis of a branched-chain ester platform from organic waste carboxylates,” Metab. Eng. Commun., vol. 3, pp. 245–251, Dec. 2016
166	Ethanol	158	0.60667				Anaerobic		glucose		1. M. D. Stowers, “The U.S. Ethanol Industry,” 2009, 2. “Industrial Uses of Biomass Energy: The Example of Brazil - 1st Edition.” [Online]. Available: https://www.routledge.com/Industrial-Uses-of-Biomass-Energy-The-Example-of-Brazil/Rosillo-Calle-Bajay-Rothman/p/book/9780748408849. [Accessed: 27-Apr-2021
167	beta-farnesene	N/A	0.38128		Saccharomyces cerevisiae	YPD, CSM	Aerobic		glucose		A. L. Meadows et al., “Rewriting yeast central carbon metabolism for industrial isoprenoid production,” Nature, vol. 537, no. 7622, pp. 694–697, 2016.
168	Glycerol	20	0.263		Saccharomyces cerevisiae	YNB	Anaerobic		glucose	BY/tpi25/gpd1gpp2f/fps1m	M. V. Semkiv, K. V. Dmytruk, C. A. Abbas, and A. A. Sibirny, “Metabolic engineering for high glycerol production by the anaerobic cultures of Saccharomyces cerevisiae,” Appl. Microbiol. Biotechnol., vol. 101, no. 11, pp. 4403–4416, Jun. 2017
169	Methyl ketones	3.4			E. coli	LB, MOPS minimal media	Aerobic	cells were grown in LB over night and diluted into M9-MOPS minimal medium at a starting OD600 of ~0.1, 24 h and re-diluted into fresh M9-MOPS medium.	glucose	overexpression of fadR, fadD	E. B. Goh, E. E. K. Baidoo, H. Burd, T. S. Lee, J. D. Keasling, and H. R. Beller, “Substantial improvements in methyl ketone production in E. coli and insights on the pathway from in vitro studies,” Metab. Eng., vol. 26, pp. 67–76, Dec. 2014
170	Alkanes	1.31	0.013	0.032	E. coli	LB	Aerobic	2.5 L fed-batch fermentation	glucose	E. coliBL21 (DE3) ΔadhPE. coliBL21(DE3):ΔadhP Δpta-ackAE. coliBL21(DE3):Δpta-ackA ΔfadDE. coliBL21(DE3):ΔfadD ΔfadEE. coliBL21(DE3):ΔfadE ΔfadD-fadEE. coliBL21(DE3):ΔfadD,ΔfadE	Y. X. Cao, W. H. Xiao, J. L. Zhang, Z. X. Xie, M. Z. Ding, and Y. J. Yuan, “Heterologous biosynthesis and manipulation of alkanes in Escherichia coli,” Metab. Eng., vol. 38, pp. 19–28, Nov. 2016
171	fatty-acid ethyl esters	1.5			E. coli	RB. Minimal M9	Aerobic		glucose	A2A strain	F. Zhang, J. M. Carothers, and J. D. Keasling, “Design of a dynamic sensor-regulator system for production of chemicals and fuels derived from fatty acids,” Nat. Biotechnol., vol. 30, no. 4, pp. 354–359, Apr. 2012
172	Free fatty-acid	10.4	0.09		Saccharomyces cerevisiae	minimal media	Aerobic	Fed-batch cultivation	glucose		Y. J. Zhou, N. A. Buijs, Z. Zhu, J. Qin, V. Siewers, and J. Nielsen, “Production of fatty acid-derived oleochemicals and biofuels by synthetic yeast cell factories,” Nat. Commun., vol. 7, no. 1, p. 11709, May 2016.
173	Fatty alcohols	2.15			Yarrowia lipolytica	The media contained 3.4 g/L yeast nitrogen base (without amino acids and ammoniumsulfate), 2.2 g/L ammonium sulfate, and 100 g/L glucose. Specifically, 120-mL shake-flask culture (harvested at 48 h) was used as seed to inoculate 1 L fer-mentation media (with C/N 100).	Aerobic	3-L bioreactor	glucose	Maqu2220-EcfadD strain	P. Xua, K. Qiao, W. S. Ahn, and G. Stephanopoulos, “Engineering Yarrowia lipolytica as a platform for synthesis of drop-in transportation fuels and oleochemicals,” Proc. Natl. Acad. Sci. U. S. A., vol. 113, no. 39, pp. 10848–10853, Sep. 2016.
174	lipid	99	0.269		Yarrowia lipolytica	YNB media	Aerobic	3-L bioreactor	carbohydrate feedstock	ADgm-hi	K. Qiao, T. M. Wasylenko, K. Zhou, P. Xu, and G. Stephanopoulos, “Lipid production in Yarrowia lipolytica is maximized by engineering cytosolic redox metabolism,” Nat. Biotechnol., vol. 35, no. 2, pp. 173–177, Feb. 2017
175	linoleic acid	1.3			Rhodosporidium toruloides	YEPD media was sterilized at 121 °C for 15 min, 40 g L−1galactose, 30 g L−1 raffinose, 1.0 g L−1 (NH4)2SO4,1.0gL−1 Na2HPO4·12H2O, 1.0 g L−1 KH2PO4,1.5gL−1 MgSO4·7H2O, pH 6.0.	Aerobic	Flask-culture conditions	glucose		Y. Wang et al., “Overexpression of Δ12-Fatty Acid Desaturase in the Oleaginous Yeast Rhodosporidium toruloides for Production of Linoleic Acid-Rich Lipids,” Appl. Biochem. Biotechnol., vol. 180, no. 8, pp. 1497–1507, Dec. 2016.
176	docosahexaenoic acid	1.08			Lipomyces starkeyi	YPD	Aerobic	2l-fed batch fermentation	glucose		D. Salunke, R. Manglekar, R. Gadre, S. Nene, and A. M. Harsulkar, “Production of polyunsaturated fatty acids in recombinant Lipomyces starkeyi through submerged fermentation,” Bioprocess Biosyst. Eng., vol. 38, no. 7, pp. 1407–1414, Jul. 2015.
177	PHA	168			E. coli	MR medium	Aerobic	Cell recycle fed-batch cultures			W. S. Ahn, S. J. Park, and S. Y. Lee, “Production of poly(3-hydroxybutyrate) from whey by cell recycle fed-batch culture of recombinant Escherichia coli,” Biotechnol. Lett., vol. 23, no. 3, pp. 235–240, 2001
178	Acetic acid	111.7			Acetobacter aceti	YPG medium	Aerobic	Acetobacter strains first cultured in 5 ml of YPG medium in a 50-ml test tube with shaking for 24 h at 30°C, A portion (10 ml) inoculated into 2.5 liters of YPG medium supplemented with ethanol (3% [wt/vol]) and acetic acid (1% [wt/vol]) in a 5-liter minijar fermenter and further cultured at 30°C with agitation at 400 rpm and aeration at a rate of 0.20 volumes per volume per minute, until the ace…		pMV24	S. Nakano, M. Fukaya, and S. Horinouchi, “Putative ABC transporter responsible for acetic acid resistance in Acetobacter aceti,” Appl. Environ. Microbiol., vol. 72, no. 1, pp. 497–505, Jan. 2006.
179	Pyruvic acid	125.8	0.68	0.58	Yarrowia lipolytica	YNB	Aerobic	Fed-batch culture with 200g/L glycerol	Glycerol	lipolyticaSKO 6 strain	K. Cybulski, L. Tomaszewska-Hetman, M. Rakicka, P. Juszczyk, and A. Rywińska, “Production of pyruvic acid from glycerol by Yarrowia lipolytica,” Folia Microbiol. (Praha)., vol. 64, no. 6, pp. 809–820, Nov. 2019
180	lactic acid	142.1	0.82	2.96	Klebsiella pneumoniae	LB	micro-aerobic	Fed-batch fermentation	Glycerol	ΔdhaT ΔyqhD pBAD18-ldhA	X. Feng, Y. Ding, M. Xian, X. Xu, R. Zhang, and G. Zhao, “Production of optically pure d-lactate from glycerol by engineered Klebsiella pneumoniae strain,” Bioresour. Technol., vol. 172, pp. 269–275, Nov. 2014
181	Glycerol	230			Saccharomyces cerevisiae	YPED	Aerobic	aerated batch cultures grown on 400 g of glucose /liter	glucose	tpi1Δ nde1Δ nde2Δ gut2Δ mutant	K. M. Overkamp, B. M. Bakker, P. Kötter, M. A. H. Luttik, J. P. Van Dijken, and J. T. Pronk, “Metabolic engineering of glycerol production in Saccharomyces cerevisiae,” Appl. Environ. Microbiol., vol. 68, no. 6, pp. 2814–2821, Jun. 2002
182	Succinic acid	198.2	0.276	1.46	Yarrowia lipolytica	YPG medium	Aerobic	FBB fermentation under conditions of 750 cm2 cotton towel. 120 g/L initial glycerol and 3 L/min aeration rate.	Glycerol		C. Li, X. Yang, S. Gao, H. Wang, and C. S. K. Lin, “High efficiency succinic acid production from glycerol via in situ fibrous bed bioreactor with an engineered Yarrowia lipolytica,” Bioresour. Technol., vol. 225, pp. 9–16, Feb. 2017
183	butanoic acid	63.02	0.45		Clostridium tyrobutyricum	Reinforced Clostridial Medium (RCM)	Anaerobic	immobilized cell fermentation at pH 6.5	glucose	PAK-Em	C. Ma, J. Ou, M. Miller, S. McFann, and X. (Margaret) Liu, “High production of butyric acid by Clostridium tyrobutyricum mutant,” Front. Chem. Sci. Eng., vol. 9, no. 3, pp. 369–375, Sep. 2015.
184	2-butanol	13.41	0.1		Lactobacillus diolivorans	MRS, LB medium	Anaerobic		glucose	Overexpression of PduQ	H. Russmayer, H. Marx, and M. Sauer, “Microbial 2-butanol production with Lactobacillus diolivorans,” Biotechnol. Biofuels, vol. 12, no. 1, p. 262, Nov. 2019.
185	Itaconic acid	43	0.6		E. coli	M9 medium	micro-aerobic	fed-batch bioreactor using glycerol in 0.5L stirred tank bioreactor, 0.25L M9 medium, stirrer speed 300-800 rpm, aeration 1vvm, pH 6.4	Glycerol	pPC168 PLlacO1::cad(AT) acnB(EC); ColE1 ori; KanR pGC7 PLlacO1::gltA(EC) pyc(CG); p15A ori; SpecR	P. Chang, G. S. Chen, H. Y. Chu, K. W. Lu, and C. R. Shen, “Engineering efficient production of itaconic acid from diverse substrates in Escherichia coli,” J. Biotechnol., vol. 249, pp. 73–81, May 2017.
186	Glutaric acid	90	0.7 mol/mol	1.8	Corynebacterium glutamicum	minimal media	Aerobic	fed-batch reactor, aeration 1vvm, 30°C	glucose and molasses based sugar	GTA-4	C. M. Rohles et al., “A bio-based route to the carbon-5 chemical glutaric acid and to bionylon-6,5 using metabolically engineered: Corynebacterium glutamicum,” Green Chem., vol. 20, no. 20, pp. 4662–4674, Oct. 2018
187	3-methyl-3-buten-1-ol	10.8	0.105	0.157	E. coli	minimal medium	Aerobic	fed-batch fermentation at	glucose	AK30 strain: DH1 ΔpoxB ΔackA Δpta	A. Kang et al., “Optimization of the IPP-bypass mevalonate pathway and fed-batch fermentation for the production of isoprenol in Escherichia coli,” Metab. Eng., vol. 56, pp. 85–96, Dec. 2019.
188	Butyl acetate	5.57			Clostridium beijerinckii (NCIMB 8052)	LB medium	Anaerobic	fermentation of C. beijerinckii was performed in 500 mL anaerobic shake flasks (customized from Guxin Biotech Co., Ltd., Shanghai, China) with a 400 mL working volume. The fermentation medium was composed of (L−1 distilled water): glucose, 60 g; K2HPO4·3H2O, 0.655 g; KH2PO4, 0.5 g; potassium acetate (KAC), 7.86 g; NH4Cl, 2.14 g; MgSO4·7H2O, 0.2 g; MnSO4·H2O, 0.01 g; NaCl, 0.01 g; FeSO4·7H2O, 0.01…	glucose, dodecane	ATF1	D. Fang et al., “Metabolic and process engineering of Clostridium beijerinckii for butyl acetate production in one step,” J. Agric. Food Chem., vol. 68, no. 35, pp. 9475–9487, Sep. 2020
189	Isobutyl acetate	19.7			E. coli (JCL260)		Aerobic		glucose	strain 7: pAL953- PLlacO1: ackA–pta pAL603- PLlacO1: alsS–ilvCD, PLlacO1: kivd–adhA pAL991- PLlacO1: ATF1	Y. Tashiro, S. H. Desai, and S. Atsumi, “Two-dimensional isobutyl acetate production pathways to improve carbon yield,” Nat. Commun., vol. 6, no. 1, pp. 1–9, Jun. 2015
190	docosahexaenoic acid	35.32		0.409	Schizochytrium sp. ATCC20888		Aerobic		glucose		J. Li et al., “A strategy for the highly efficient production of docosahexaenoic acid by Aurantiochytrium limacinum SR21 using glucose and glycerol as the mixed carbon sources,” Bioresour. Technol., vol. 177, pp. 51–57, Feb. 2015	Richard B. Bailey et al., “Enhanced production of lipids containing polyenoic fatty acid by very high density cultures of eukaryotic microbes in fermentors,” 10-Feb-2000
